# Supplementary material for: Identification of New Leaf Rust Resistance Loci in Wheat and Wild Relatives by Array-Based SNP Genotyping and Association Genetics
Source: Front Plant Sci. 2020 Nov 16;11:583738. doi: 10.3389/fpls.2020.583738 (PMC7701059; doi:10.3389/fpls.2020.583738)
Supplement: Supplementary Table 6 — Linear mixed model for leaf rust severity of the spring (A) and winter (B) panels across years and locations. [file Table_6.XLSX]

## Sheet: Table S6A
Table S6A Linear mixed model for leaf rust severity of the spring panel across years and locations.
Linear mixed model fit by REML. t-tests use Satterthwaite's method ['lmerModLmerTest']
Formula: Severity ~ Location + (1|Genotype) + (1|Year) + (1|Genotype:Location) + (1|Genotype:Year:Location)
Random effects:
Groups	Variance	Standard deviation	Percentage variance
Genotype:Year:Location	127.26	11.281	19.1873
Genotype:Location	110.91	10.531	16.7222
Genotype	284.89	16.879	42.9536
Year	13.92	3.731	2.09876
Residual	126.27	11.237	19.0381
REML criterion at convergence: 24104.8
Scaled residuals:
Min	1Q	Median	3Q	Max
-3.9662	-0.3564	-0.0731	0.3107	4.1252
Fixed effects:
Estimate	Std.	Error	df	t	value	Pr(>|t|)
(Intercept)	24.032	2.368	6.473	10.151	3.27e-05	***
LocationOTT	7.759	1.316	327.609	5.896	9.28e-09	***
LocationSK	-5.537	1.604	665.703	-3.452	0.000591	***
Signif. codes: 0 ‘***’ 0.001 ‘**’ 0.01 ‘*’ 0.05 ‘.’ 0.1 ‘ ’ 1
Number of obs: 2818, groups: Genotype:Year:Location, 1569; Genotype:Location, 640; Genotype, 216; Year, 4

## Sheet: Table S6B
Table S6B Linear mixed model for leaf rust severity of the winter panel across years and locations.
Linear mixed model fit by REML. t-tests use Satterthwaite's method ['lmerModLmerTest']
Formula: Severity ~ Location + (1|Genotype) + (1|Year) + (1|Genotype:Location) + (1|Genotype:Year:Location)
Random effects:
Groups	Variance	Standard deviation	Percentage variance
Genotype:Year:Location	37.906	6.157	6.82206
Genotype:Location	117.289	10.83	21.1088
Genotype	334.735	18.296	60.2433
Year	1.761	1.327	0.316932
Residual	63.948	7.997	11.5089
REML criterion at convergence: 7877.7
Scaled residuals:
Min	1Q	Median	3Q	Max
-4.1123	-0.2567	-0.0675	0.1779	4.2617
Fixed effects:
Estimate	Std.	Error	df	t	value	Pr(>|t|)
(Intercept)	20.418	1.881	38.043	10.852	3.3e-13	***
LocationOTT	-7.097	1.56	137.385	-4.548	1.18e-05	***
Signif. codes: 0 ‘***’ 0.001 ‘**’ 0.01 ‘*’ 0.05 ‘.’ 0.1 ‘ ’ 1
Number of obs: 978, groups: Genotype:Year:Location, 558; Genotype:Location, 310; Genotype, 167; Year, 3
