# Supplementary material for: Identification of New Leaf Rust Resistance Loci in Wheat and Wild Relatives by Array-Based SNP Genotyping and Association Genetics
Source: Front Plant Sci. 2020 Nov 16;11:583738. doi: 10.3389/fpls.2020.583738 (PMC7701059; doi:10.3389/fpls.2020.583738)
Supplement: Supplementary Table 10 — Significant quantitative trait nucleotides (QTNs) and linkage disequilibrium blocks (LDBs) for infection type (IT) response against six leaf rust isolates identified by association mapping using one single-locus and seven multi-locus models. [file Table_10.XLSX]

## Sheet: Table S10
Table S10 Significant quantitative trait nucleotides (QTNs) and linkage disequilibrium blocks (LDBs) for infection type (IT) response against six leaf rust isolates identified by association mapping using one single-locus and seven multi-locus models.
QTN or LDB	Chromosome	ES position†	CS position‡	Trait	Model	P-value	FDR	r2 (%)
Single-locus model
35133-IAAV6025	1B	17996346	211312483	MBDS	MLM	6.5573e-06	0.0318226	5.874
18893-D_GCE8AKX02HMJXL_374	3B	3636964	15138756	MBDS	MLM	2.1326e-07	0.0020699	12.554
15576-D_contig10567_587	3D	18712927	141408492	MBDS	MLM	8.8826e-06	0.0287382	6.21
7730-BS00029462_51	5A	59649678	682898385	MBDS	MLM	1.4188e-05	0.0344272	7.778
15734-D_contig14443_745	7D	29487395	232496636	TDBG1	MLM	4.1326e-06	0.040111	6.547
Multi-locus models
59361-RAC875_c5831_1486	1A	2842931	10969929	TDBG2	FASTmrEMMA	8.54083e-06	0.0276353	3.7788
					pKWmEB	1.04208e-06	0.00202309	4.5353
				MBRJ	FASTmrEMMA	3.83707e-08	0.000372464	6.0811
					FASTmrMLM	1e-05	0.0161783	3.0004
					ISIS EM-BLASSO	3.50026e-07	0.0033977	3.8389
					pLARmEB	1.72504e-07	0.000334899	1.7616
31602-GENE-0002_856	1A	6126581	32087536	MGBJ	ISIS EM-BLASSO	1.01391e-06	0.00246051	3.4876
					pLARmEB	1.07399e-08	3.47507e-05	3.8168
10214-BS00068036_51	1A	19184558	268932276	MBDS	mrMLM	5.46792e-08	0.000106154	1.3604
45449-Kukri_c44500_315	1A	51373780	586952125	TDBG1	ISIS EM-BLASSO	6.46845e-08	0.000627892	5.5422
					mrMLM	1.35423e-05	0.026291	3.984
				MGBJ	mrMLM	2.76332e-05	0.0268235	2.4008
79341-wsnp_Ex_rep_c67474_66076379	1A	51947254	591093391	MGBJ	ISIS EM-BLASSO	3.71279e-06	0.00720801	2.6593
7236-BS00022745_51	1B	10506222	70711155	MBDS	mrMLM	2.85242e-06	0.00346106	16.3437
26303-Excalibur_c4215_1327	1B	11454914	95323618	TDBG2	mrMLM	5.61087e-07	0.00181549	23.7307
35133-IAAV6025	1B	17996346	211312483	MBDS	FASTmrEMMA	4.03645e-06	0.00979446	28.0274
50495-Kukri_rep_c91496_1320	1B	23501259	331420168	TDBG2	mrMLM	4.27603e-06	0.00830148	1.4587
73768-Tdurum_contig9164_233	1B	38316698	533863925	MBRJ	mrMLM	5.31819e-05	0.0397105	1.7438
42096-Kukri_c19247_711	1B	46371325	614455731	MBDS	FASTmrMLM	5.05126e-06	0.0490275	4.1253
3634-BobWhite_c48071_144	1B	46371457	614455863	MBDS	ISIS EM-BLASSO	5.42126e-07	0.00526242	3.9469
					mrMLM	4.74606e-08	0.000115175	3.4851
					pKWmEB	1.57688e-06	0.00510226	5.9417
					pLARmEB	1.1051e-05	0.0119191	2.0353
				MBRJ	FASTmrMLM	1.68694e-05	0.023393	2.4506
					pLARmEB	1.37088e-05	0.0190102	1.142
19295-D_GDS7LZN01C3204_275	1D	13344056	101139746	MBRJ	mrMLM	2.18246e-05	0.0211851	1.6988
7344-BS00022962_51	1D	18748882	206101173	MBRJ	mrMLM	2.0699e-06	0.00334875	4.3967
19196-D_GDRF1KQ02F3JLT_66	1D	23608794	273812413	MGBJ	mrMLM	5.88167e-06	0.00951556	2.7674
34680-IAAV32	2A	530672	2485710	MGBJ	FASTmrMLM	9.71852e-06	0.0235844	2.9957
					ISIS EM-BLASSO	3.65595e-08	0.000177442	5.7797
					pLARmEB	1.81134e-05	0.0195363	2.384
28816-Excalibur_c7682_652	2A	1479703	4951004	MBDS	mrMLM	1.42427e-08	4.60846e-05	9.4025
17360-D_F1BEJMU02HXD1T_170	2A	3411802	12985497	MGBJ	FASTmrEMMA	1.68267e-06	0.0163337	5.0007
					FASTmrMLM	1.11071e-06	0.00539083	3.639
					pLARmEB	9.59843e-06	0.0155287	2.3081
79083-wsnp_Ex_rep_c103167_88182254	2A	8789232	33044691	TDBG1	mrMLM	1.01532e-05	0.0246393	2.8054
69592-Tdurum_contig28682_120	2A	17652561	101381504	MBRJ	pKWmEB	5.24928e-06	0.010191	6.7993
80648-wsnp_Ku_c6826_11860405	2A	18148801	104876095	TJBJ	pKWmEB	6.54938e-08	0.000317874	4.6366
21864-Excalibur_c11398_913	2A	19047720	118446604	MGBJ	mrMLM	4.52828e-05	0.03996	4.3625
9450-BS00065105_51	2B	13160891	69648893	MGBJ	mrMLM	1.11759e-05	0.0135606	5.5708
23783-Excalibur_c22285_762	2B	41900269	493986458	MBDS	mrMLM	5.79566e-08	9.37641e-05	3.2345
34658-IAAV3067	2B	59986040	699173434	TJBJ	pKWmEB	1.57217e-06	0.00254351	2.6035
1208-BobWhite_c18678_95	2B	65768257	751257597	TJBJ	pKWmEB	1.69278e-07	0.000410795	9.0453
32025-GENE-0674_105	2D	4280949	13773809	TDBG1	pLARmEB	3.64418e-05	0.0442176	5.4477
49685-Kukri_rep_c115699_270	2D	10389133	39829875	TDBG2	FASTmrEMMA	2.36919e-06	0.0114989	5.7801
15256-D_contig03226_643	2D	21168132	130822442	MBRJ	FASTmrMLM	3.40487e-05	0.0413138	1.3702
					pLARmEB	4.22961e-05	0.0456187	0.6337
36072-IACX5941	2D	56989423	588793333	MGBJ	pKWmEB	6.35624e-08	0.0001234	6.2285
					pLARmEB	1.7746e-05	0.0215326	1.9015
75000-tplb0052b23_2493	2D	63093449	621964724	TDBG1	FASTmrEMMA	3.93641e-07	0.00191054	6.2333
					pKWmEB	9.56974e-09	9.28935e-05	5.2555
					pLARmEB	2.24802e-07	0.00218215	2.9895
23770-Excalibur_c22201_907	2D	66392054	638613120	TDBG1	ISIS EM-BLASSO	2.07348e-06	0.00503182	3.925
					pKWmEB	9.58517e-06	0.0155072	6.1587
64223-RFL_Contig3121_1979	2D	68977727	648470008	MBDS	pKWmEB	2.01512e-05	0.0391215	5.8499
68735-Tdurum_contig18471_456	3A	12271225	75030422	MBDS	mrMLM	2.33716e-07	0.000324097	34.6452
66940-Tdurum_contig11121_997	3A	35206706	532448246	MBRJ	mrMLM	6.92191e-07	0.0022397	4.5832
45125-Kukri_c41296_172	3A	39136445	576209128	MBRJ	mrMLM	7.87544e-07	0.00191117	2.2677
18893-D_GCE8AKX02HMJXL_374	3B	3636964	15138756	MBDS	FASTmrEMMA	2.13304e-06	0.00690111	4.0071
					ISIS EM-BLASSO	8.30615e-06	0.0268759	2.9122
					mrMLM	7.755e-09	3.76389e-05	1.8641
					pKWmEB	2.53454e-10	2.46028e-06	5.4365
					pLARmEB	2.15625e-07	0.000261634	2.4744
				MBRJ	ISIS EM-BLASSO	2.08018e-06	0.00673077	2.9764
					pKWmEB	4.18215e-07	0.0013532	3.0155
				MGBJ	pKWmEB	2.34693e-05	0.0253129	1.5291
34803-IAAV3924	3B	4638891	20450624	TDBG2	pKWmEB	5.41253e-07	0.00131349	6.79
3061-BobWhite_c39480_122	3B	8083971	43274832	MBDS	mrMLM	3.65873e-06	0.00394614	2.0888
				TJBJ	mrMLM	1.18907e-05	0.0230846	4.6033
40913-Kukri_c12869_154	3B	16265564	130647769	TDBG1	mrMLM	1.57156e-09	1.52551e-05	27.9001
54100-RAC875_c15509_436	3B	25278634	283604560	MGBJ	FASTmrMLM	2.07683e-06	0.00671993	4.8378
63403-RAC875_s108395_60	3B	45393728	605267456	TDBG2	mrMLM	1.4985e-07	0.00145459	3.7159
				TJBJ	mrMLM	2.79148e-06	0.0090323	2.5199
7087-BS00022441_51	3B	67369199	807288990	MBRJ	FASTmrMLM	2.18575e-06	0.00424342	5.1645
					pLARmEB	2.38342e-06	0.00385598	2.3637
				MGBJ	pKWmEB	8.51138e-06	0.0118029	3.8733
				TJBJ	pLARmEB	6.68652e-07	0.0032453	5.2274
24328-Excalibur_c25515_95	3D	7067399	28331100	MBDS	FASTmrEMMA	4.13048e-09	4.00904e-05	4.823
				TJBJ	FASTmrEMMA	2.99847e-06	0.0291061	4.4751
					FASTmrMLM	3.73422e-06	0.00906202	5.2141
					ISIS EM-BLASSO	1.08069e-08	0.000104903	7.6898
					pKWmEB	1.56027e-07	0.000504851	6.5747
					pLARmEB	2.2636e-07	0.00219728	5.241
12255-BS00105800_51	3D	62756272	611558374	MBRJ	pKWmEB	2.57573e-07	0.00125013	11.1928
27771-Excalibur_c57945_355	4A	9819250	94765437	TDBG1	pKWmEB	4.8708e-07	0.00157603	8.185
72073-Tdurum_contig50388_343	4A	24305775	499345041	TDBG1	mrMLM	5.22148e-06	0.016895	2.271
7448-BS00023151_51	4A	36979330	606586747	MGBJ	ISIS EM-BLASSO	3.70084e-05	0.0359241	2.7682
76797-wsnp_Ex_c16175_24619793	4A	37445211	609805169	TDBG1	ISIS EM-BLASSO	6.90717e-07	0.00335239	3.7361
				MBDS	pKWmEB	1.01321e-06	0.00491761	4.1271
71854-Tdurum_contig47858_908	4A	40461607	625249359	MGBJ	mrMLM	3.80847e-06	0.0092422	1.4934
59451-RAC875_c59673_500	4A	47586766	681670895	TDBG2	mrMLM	2.49562e-06	0.00605625	3.317
57805-RAC875_c42019_60	4B	31949511	538268580	MBRJ	mrMLM	1.18161e-10	1.14699e-06	14.4676
11789-BS00093089_51	4B	32945077	552827949	TDBG1	FASTmrEMMA	7.22603e-09	7.01431e-05	13.8227
40320-Kukri_c10321_228	4B	34791181	577655390	MBDS	FASTmrEMMA	2.31633e-08	0.000112411	9.9404
					mrMLM	4.36411e-09	4.23624e-05	6.9563
				TJBJ	mrMLM	2.28865e-07	0.0011108	9.1275
38863-Ku_c2346_1339	4B	39423969	623066948	TDBG2	mrMLM	6.91072e-06	0.0111804	4.7875
				TJBJ	FASTmrMLM	4.39238e-06	0.00852737	6.1045
					pKWmEB	9.72523e-11	9.44028e-07	10.4633
					pLARmEB	1.88452e-05	0.0365861	4.5639
16427-D_contig29825_215	4D	11840744	82020798	TDBG2	pKWmEB	1.97651e-08	6.39533e-05	10.9507
					pLARmEB	2.16073e-06	0.0069914	5.066
				TDBG1	FASTmrMLM	2.28297e-08	0.000221608	11.1523
					pLARmEB	2.95121e-07	0.00143237	8.1715
				MBRJ	pLARmEB	1.68345e-05	0.0204266	3.8302
28179-Excalibur_c63208_105	4D	24971441	358039232	MGBJ	mrMLM	5.97925e-05	0.0446466	4.3884
17554-D_F5XZDLF01DBHUA_161	4D	39554039	496649455	TDBG2	pKWmEB	2.48714e-05	0.0402378	3.0306
					pLARmEB	1.27879e-07	0.00124132	2.5515
36264-IACX8002	5A	32671079	485201265	TDBG2	mrMLM	1.55931e-05	0.0216232	3.6109
61301-RAC875_c9984_1003	5A	45300674	585458451	TDBG1	pKWmEB	6.80143e-07	0.00165054	8.719
59300-RAC875_c57603_144	5A	57209477	666228776	MBRJ	FASTmrEMMA	2.30197e-06	0.0111726	3.7729
					FASTmrMLM	1.42889e-08	6.93512e-05	5.1283
					ISIS EM-BLASSO	5.52968e-07	0.00268383	4.307
					pLARmEB	3.77311e-08	0.000183128	2.2175
4426-BobWhite_c8115_648	5A	59636933	682712749	MGBJ	pKWmEB	8.94746e-08	0.000144755	5.7942
7730-BS00029462_51	5A	59649678	682898385	MGBJ	FASTmrEMMA	5.84117e-06	0.0283501	3.2858
					FASTmrMLM	1.72743e-05	0.0335363	2.7446
					ISIS EM-BLASSO	4.79402e-09	4.65356e-05	4.4704
					pKWmEB	4.27366e-08	0.000103711	4.3711
					pLARmEB	2.42382e-13	2.3528e-09	4.7393
				TJBJ	mrMLM	5.37178e-06	0.013036	2.3976
9144-BS00063855_51	5A	60041146	685964650	MBRJ	mrMLM	2.84894e-05	0.0251406	0.6627
69406-Tdurum_contig28001_110	5A	62393984	700619759	MBRJ	mrMLM	4.76902e-06	0.00578661	3.6635
51347-Ra_c19198_137	5B	3351931	26916277	MGBJ	ISIS EM-BLASSO	7.4559e-07	0.00241248	3.0859
1854-BobWhite_c2479_214	5B	8005367	78420589	TDBG1	ISIS EM-BLASSO	1.02707e-06	0.00332326	6.231
					pLARmEB	4.7874e-06	0.00929426	4.4473
72519-Tdurum_contig56538_337	5B	11150978	124636878	TDBG1	FASTmrMLM	1.71672e-05	0.0208303	3.2235
				TJBJ	FASTmrMLM	1.8954e-06	0.00613288	4.9532
35222-IAAV6616	5B	27700285	397673282	MBRJ	mrMLM	5.22468e-05	0.0422633	1.216
				MGBJ	ISIS EM-BLASSO	4.43609e-05	0.0391465	1.3979
					mrMLM	6.4742e-05	0.0448893	2.3432
					pKWmEB	3.52371e-08	0.000114016	3.0636
					pLARmEB	9.20662e-08	0.000223422	2.0203
34690-IAAV3268	5B	36882646	488107093	MBRJ	mrMLM	2.55804e-06	0.00354727	1.784
63448-RAC875_s116069_221	5B	38928763	506951332	TDBG2	pKWmEB	2.96347e-11	2.87664e-07	7.1829
				MGBJ	pKWmEB	1.1855e-05	0.0143846	2.693
81257-wsnp_Ra_c8465_14340896	5B	43019489	539293955	TJBJ	mrMLM	1.47695e-10	1.43368e-06	6.5069
34530-IAAV2296	5B	46348200	566686138	TJBJ	ISIS EM-BLASSO	1.82684e-05	0.0443328	3.5521
74020-Tdurum_contig97942_163	5B	64940412	701174382	TDBG1	ISIS EM-BLASSO	9.73419e-06	0.018898	2.8374
18809-D_GCE8AKX01CE518_452	5D	24006533	302353075	MGBJ	mrMLM	3.6425e-07	0.00176789	1.018
48181-Kukri_c8949_906	5D	29344468	354938992	MBRJ	mrMLM	8.1357e-07	0.00157946	NA
15938-D_contig18780_204	5D	49314995	486259068	TDBG2	FASTmrEMMA	1.81009e-10	1.75705e-06	9.2631
10557-BS00071571_51	6A	541913	1879563	MGBJ	ISIS EM-BLASSO	2.42605e-05	0.0261663	2.7435
					pLARmEB	9.78363e-06	0.0135671	2.2532
78974-wsnp_Ex_c965_1845676	6A	41299205	581747079	MGBJ	mrMLM	1.85739e-05	0.020033	3.0846
63713-RFL_Contig1715_631	6A	44163966	597292476	MBRJ	FASTmrMLM	1.02873e-06	0.00249647	2.7398
					pLARmEB	7.2277e-08	0.000175398	1.4981
14865-CAP8_c6448_265	6A	45814954	604882706	MBDS	pKWmEB	1.3471e-05	0.0326907	6.21
18412-D_GBF1XID01EGI95_65	6B	5016981	25279886	TDBG2	FASTmrMLM	1.38963e-05	0.0449638	6.0931
					pLARmEB	1.77828e-05	0.0345235	3.5335
				TJBJ	FASTmrMLM	8.29087e-07	0.00804795	5.4703
					ISIS EM-BLASSO	1.45881e-05	0.0472022	3.9591
					pLARmEB	2.56035e-06	0.00828444	4.0346
44910-Kukri_c39321_112	6B	18048837	151131531	TDBG2	pKWmEB	1.01251e-08	4.91422e-05	11.3228
				MBDS	pLARmEB	4.05322e-05	0.0357678	3.759
				TJBJ	pKWmEB	4.48229e-07	0.000870192	6.7134
5404-BobWhite_rep_c63804_353	6B	31156326	451926960	TDBG2	pLARmEB	8.32339e-07	0.00403976	4.6858
76118-wsnp_CD452643B_Ta_2_1	6B	32588153	474177746	TDBG2	ISIS EM-BLASSO	3.88866e-06	0.0377472	4.1546
					mrMLM	3.16282e-07	0.00153507	4.7584
				TDBG1	FASTmrMLM	2.50669e-07	0.00121662	3.8575
20105-Ex_c20946_574	6B	33247778	481863585	MBRJ	mrMLM	1.37598e-05	0.0148407	3.1863
28858-Excalibur_c7785_123	6B	36116504	526481172	MBRJ	ISIS EM-BLASSO	3.56287e-06	0.00864619	2.5374
404-BobWhite_c12770_158	6B	36284936	528622948	MBRJ	FASTmrMLM	5.25412e-09	5.10017e-05	5.4868
					pLARmEB	4.5867e-08	0.00014841	2.2374
8425-BS00046264_51	6B	52998819	704974282	TDBG1	FASTmrMLM	1.28795e-06	0.00250043	3.0795
48184-Kukri_c89555_57	6D	1241716	3917522	MGBJ	ISIS EM-BLASSO	4.45759e-06	0.00721164	4.4203
44590-Kukri_c3664_1071	6D	3333799	10910854	MGBJ	mrMLM	5.88086e-10	5.70855e-06	6.8225
9598-BS00065628_51	6D	8903806	40773214	MBRJ	pKWmEB	3.01648e-06	0.00732024	2.8796
14891-CAP8_c6799_93	6D	45185823	462632139	MBRJ	pKWmEB	2.50207e-08	0.000242876	10.7029
62295-RAC875_rep_c114991_493	7A	5042920	19006634	MBRJ	FASTmrMLM	1.80053e-08	5.82591e-05	4.9298
					ISIS EM-BLASSO	5.54498e-06	0.010765	2.8473
					pLARmEB	3.004e-08	0.000291598	2.2208
25092-Excalibur_c31383_82	7A	7627239	31879084	TDBG2	FASTmrMLM	2.22382e-06	0.0107933	7.9827
28748-Excalibur_c7538_2718	7A	8279179	35602223	TDBG1	FASTmrMLM	3.53346e-05	0.0342993	1.0957
				MGBJ	mrMLM	1.1074e-05	0.0153565	1.2144
55491-RAC875_c23339_236	7A	9877239	48094405	TDBG1	pKWmEB	5.39511e-06	0.0104741	7.4292
60067-RAC875_c67063_703	7A	18373820	112265416	MBDS	pLARmEB	2.94917e-05	0.0286276	2.5661
60997-RAC875_c90330_82	7A	64009713	721224063	TJBJ	ISIS EM-BLASSO	1.21899e-06	0.00591637	4.0279
23174-Excalibur_c18631_169	7A	66024320	733332972	TDBG1	FASTmrMLM	2.56094e-06	0.00355129	2.3857
27109-Excalibur_c50044_749	7B	1288042	6179392	TDBG2	FASTmrMLM	1.63456e-06	0.0158667	7.1181
				TDBG1	FASTmrMLM	5.60402e-07	0.00135996	7.493
					pLARmEB	9.96782e-07	0.00322525	4.741
				TJBJ	FASTmrMLM	1.71751e-06	0.00833593	6.4258
					pLARmEB	1.16439e-05	0.0282568	4.1268
10797-BS00075332_51	7B	42859676	611615637	MGBJ	pKWmEB	5.7069e-09	2.76984e-05	4.8769
3028-BobWhite_c39053_78	7B	42902200	611743356	MBRJ	mrMLM	8.56276e-08	0.000415594	3.5697
				MGBJ	ISIS EM-BLASSO	1.3807e-05	0.0191464	2.3106
					pLARmEB	5.39635e-10	2.61912e-06	3.648
5025-BobWhite_rep_c52876_72	7B	42924531	612257379	TDBG1	FASTmrMLM	3.53021e-05	0.0380753	3.6437
					pLARmEB	1.22349e-05	0.019794	3.6229
56081-RAC875_c27548_417	7B	44078960	626239007	TDBG2	pLARmEB	3.6779e-06	0.00892534	3.2247
9018-BS00063208_51	7B	45012101	637618402	MGBJ	ISIS EM-BLASSO	1.46083e-05	0.0177253	3.4977
					mrMLM	5.6431e-05	0.045648	5.4099
73054-Tdurum_contig67161_99	7B	52675393	703310984	TJBJ	pLARmEB	2.6418e-05	0.0427399	1.8523
19354-D_GDS7LZN02F1Q5F_180	7D	8876753	45129712	TDBG1	mrMLM	1.79429e-05	0.0290286	9.1464
				MGBJ	FASTmrMLM	3.55059e-07	0.00344656	9.3264
					mrMLM	3.78021e-06	0.0122315	14.2699
				TJBJ	pKWmEB	6.48336e-06	0.00899057	14.0191
42140-Kukri_c19466_627	7D	11431983	59936619	MGBJ	pKWmEB	3.77485e-15	3.66425e-11	18.8084
					pLARmEB	6.76083e-06	0.0131255	4.7748
55515-RAC875_c23473_165	7D	13138190	70126657	MGBJ	mrMLM	5.09743e-06	0.00989615	6.8767
52752-Ra_c8680_450	7D	17448451	101475229	TDBG1	mrMLM	2.86202e-06	0.0138908	15.987
15734-D_contig14443_745	7D	29487395	232496636	TDBG1	FASTmrMLM	3.86278e-07	0.00124987	2.4668
					pKWmEB	2.04786e-07	0.000993929	4.571
					pLARmEB	1.52686e-06	0.00370531	1.9356
72568-Tdurum_contig5724_344	7D	55472396	587733069	TDBG1	FASTmrMLM	1.66456e-06	0.00269298	3.7114
					pLARmEB	1.28736e-05	0.017852	2.4265
18377-D_GBF1XID01CATV7_146	7D	57228181	600701805	TJBJ	ISIS EM-BLASSO	1.95569e-05	0.0379678	6.2793
15958-D_contig19288_196	7D	60975397	619884620	MBRJ	FASTmrMLM	3.55304e-05	0.0383215	3.6209
24279-Excalibur_c25224_202	Un	7586582	51205798	MBDS	ISIS EM-BLASSO	8.11895e-06	0.0394053	2.1543
Multi-locus model RTM§
59361-RAC875_c5831_1486	1A	2842931	10969929	MBRJ	RTM	3.25e-08	0.000246982	7.89097
35133-IAAV6025	1B	17996346	211312483	MBRJ	RTM	1.89e-05	0.0287721	3.72716
59043-RAC875_c54588_191	2A	30457856	393113820	TJBJ	RTM	1.79e-06	0.00679729	NA
75000-tplb0052b23_2493	2D	63093449	621964724	TDBG2	RTM	2.25e-05	0.056958	4.67095
8908-BS00062734_51	3B	40260670	545069001	MGBJ	RTM	2.17e-09	1.64825e-05	8.51868
				TDBG1	RTM	8.79e-13	6.68369e-09	12.3398
7087-BS00022441_51	3B	67369199	807288990	MBRJ	RTM	2.73e-05	0.0345894	3.82864
16427-D_contig29825_215	4D	11840744	82020798	MBRJ	RTM	1.63e-05	0.0413809	4.8331
75749 - 41702	5A	45586083-45592178	588737306-588742167	TDBG2	RTM	4.39e-06	0.0166828	5.41533
59300-RAC875_c57603_144	5A	57209477	666228776	MBRJ	RTM	9.6e-07	0.00365254	5.79553
75518 - 45559	5B	35998994-36081425	479388707-479716557	MBRJ	RTM	4.31e-05	0.0468281	6.55036
81123 - 44910	6B	18047868-18048837	151130562-479716557	MBDS	RTM	8.93e-07	0.00678972	6.59463
72452 - 72450	6B	40385382-40386543	582823808-582824969	TJBJ	RTM	1.12e-09	8.51857e-06	11.1484
18070-D_GB5Y7FA02G6KBX_382	6D	29082978	339399173	MBRJ	RTM	1.69e-05	0.0322093	3.6141
79153 - 20908	7B	38253859-38327914	561748617-561748617	TDBG2	RTM	5.26e-12	4.00328e-08	14.722
42140-Kukri_c19466_627	7D	11431983	59936619	MGBJ	RTM	7.71e-06	0.0293231	4.34372
† Position on the concatenated exome sequence (ES) of Chinese Spring (includes high-confidence genes and up to 5Kb flanking sequences)
‡ Position on the Chinese Srping (CS) reference genome sequence v.1.0 (IWGSC 2018)
§ For significant SNP LDBs identified by RTM, only the SNP index are shown.
