# Supplementary material for: Identification of New Leaf Rust Resistance Loci in Wheat and Wild Relatives by Array-Based SNP Genotyping and Association Genetics
Source: Front Plant Sci. 2020 Nov 16;11:583738. doi: 10.3389/fpls.2020.583738 (PMC7701059; doi:10.3389/fpls.2020.583738)
Supplement: Supplementary Table 12 — Functional annotation of genes located within 5 KB of quantitative trait nucleotides (QTNs) or peak single nucleotide polymorphism (SNP) markers of linkage disequilibrium blocks (LDBs) associated with infection type response against six leaf rust isolates and leaf rust (LR) severity of the spring and winter diversity panels. [file Table_12.XLSX]

## Sheet: Table S12
Table S12 Functional annotation of genes located within 5KB of quantitative trait nucleotides (QTNs) or peak single nucleotide polymorphism (SNP) markers of linkage disequilibrium blocks (LDBs) associated with infection type response against six leaf rust isolates and leaf rust (LR) severity of the spring and winter diversity panels.
QTN or LDB	chromosome	ES position†	CS position‡	Gene ID	Trait§	Method	P-value	FDR	r2 (%)	Disease resistance	Gene annotation	Gene annotation
INFECTION TYPE
59361-RAC875_c5831_1486	1A	2842931	10969929	TraesCS1A02G022500	TDBG2	pKWmEB	1.04e-06	0.00202309	4.5353
					TDBG2	FASTmrEMMA	8.54e-06	0.0276353	3.7788
					MBRJ	RTM	3.25e-08	0.000246982	7.89097
					MBRJ	FASTmrEMMA	3.84e-08	0.000372464	6.0811
					MBRJ	ISIS EM-BLASSO	3.5e-07	0.0033977	3.8389
					MBRJ	FASTmrMLM	1e-05	0.0161783	3.0004
					MBRJ	pLARmEB	1.73e-07	0.000334899	1.7616
31602-GENE-0002_856	1A	6126581	32087536	TraesCS1A02G050100	MGBJ	pLARmEB	1.07e-08	3.48e-05	3.8168	1	Alcohol dehydrogenase	GroES-like superfamily, Armadillo-type fold
					MGBJ	ISIS EM-BLASSO	1.01e-06	0.00246051	3.4876	1	Alcohol dehydrogenase	GroES-like superfamily, Armadillo-type fold
10214-BS00068036_51	1A	19184558	268932276	TraesCS1A02G154400	MBDS	mrMLM	5.47e-08	0.000106	1.3604		Putative S-adenosyl-L-methionine-dependent methyltransferase
45449-Kukri_c44500_315	1A	51373780	586952125	TraesCS1A02G437400	TDBG1	ISIS EM-BLASSO	6.47e-08	0.000627892	5.5422
					TDBG1	mrMLM	1.35e-05	0.026291	3.984
					MGBJ	mrMLM	2.76e-05	0.0268235	2.4008
79341-wsnp_Ex_rep_c67474_66076379	1A	51947254	591093391	TraesCS1A02G442400	MGBJ	ISIS EM-BLASSO	3.71e-06	0.00720801	2.6593	1	P-loop NTPase, Armadillo-type fold	Helicase superfamily 1/2, ATP-binding domain
7236-BS00022745_51	1B	10506222	70711155	TraesCS1B02G086200	MBDS	mrMLM	2.85e-06	0.00346	16.3437
26303-Excalibur_c4215_1327	1B	11454914	95323618	TraesCS1B02G093900	TDBG2	mrMLM	5.61e-07	0.00181549	23.7307		Winged helix-like DNA-binding domain	DNA-directed RNA polymerase III subunit RPC3
35133-IAAV6025	1B	17996346	211312483	TraesCS1B02G147300	MBDS	FASTmrEMMA	4.04e-06	0.00979446	28.0274	1	PC-Esterase, PMR5 N-terminal domain	Trichome birefringence-like family
					MBDS	MLM	6.56e-06	0.0318	5.874	1	PC-Esterase, PMR5 N-terminal domain	Trichome birefringence-like family
					MBRJ	RTM	1.89e-05	0.0287721	3.72716	1	PC-Esterase, PMR5 N-terminal domain	Trichome birefringence-like family
50495-Kukri_rep_c91496_1320	1B	23501259	331420168	TraesCS1B02G184700	TDBG2	mrMLM	4.28e-06	0.00830149	1.4587		DNA ligase, ATP-dependent	Nucleic acid-binding, OB-fold
73768-Tdurum_contig9164_233	1B	38316698	533863925	TraesCS1B02G310800	MBRJ	mrMLM	5.32e-05	0.0397105	1.7438
42096-Kukri_c19247_711	1B	46371325	614455731	TraesCS1B02G382000	MBDS	FASTmrMLM	5.05e-06	0.049	4.1253		JAB1/MPN/MOV34 metalloenzyme	BRCC36, C-terminal helical domain
3634-BobWhite_c48071_144	1B	46371457	614455863	TraesCS1B02G382000	MBDS	pKWmEB	1.58e-06	0.00510226	5.9417		JAB1/MPN/MOV34 metalloenzyme	BRCC36, C-terminal helical domain
					MBDS	ISIS EM-BLASSO	5.42e-07	0.00526	3.9469		JAB1/MPN/MOV34 metalloenzyme	BRCC36, C-terminal helical domain
					MBDS	mrMLM	4.75e-08	0.000115	3.4851		JAB1/MPN/MOV34 metalloenzyme	BRCC36, C-terminal helical domain
					MBDS	pLARmEB	1.11e-05	0.0119191	2.0353		JAB1/MPN/MOV34 metalloenzyme	BRCC36, C-terminal helical domain
					MBRJ	FASTmrMLM	1.69e-05	0.023393	2.4506		JAB1/MPN/MOV34 metalloenzyme	BRCC36, C-terminal helical domain
					MBRJ	pLARmEB	1.37e-05	0.0190102	1.142		JAB1/MPN/MOV34 metalloenzyme	BRCC36, C-terminal helical domain
19295-D_GDS7LZN01C3204_275	1D	13344056	101139746	TraesCS1D02G108500	MBRJ	mrMLM	2.18e-05	0.0211851	1.6988		4Fe-4S ferredoxin, iron-sulphur binding
7344-BS00022962_51	1D	18748882	206101173	TraesCS1D02G149700	MBRJ	mrMLM	2.07e-06	0.00334875	4.3967		Ribonuclease T2-like superfamily
19196-D_GDRF1KQ02F3JLT_66	1D	23608794	273812413	TraesCS1D02G195000	MGBJ	mrMLM	5.88e-06	0.00951556	2.7674		Ribokinase/fructokinase
34680-IAAV32	2A	530672	2485710	TraesCS2A02G004800	MGBJ	ISIS EM-BLASSO	3.66e-08	0.000177442	5.7797		tRNA (adenine(58)-N(1))-methyltransferase non-catalytic
					MGBJ	FASTmrMLM	9.72e-06	0.0235844	2.9957		tRNA (adenine(58)-N(1))-methyltransferase non-catalytic
					MGBJ	pLARmEB	1.81e-05	0.0195363	2.384		tRNA (adenine(58)-N(1))-methyltransferase non-catalytic
28816-Excalibur_c7682_652	2A	1479703	4951004	TraesCS2A02G012600	MBDS	mrMLM	1.42e-08	4.61e-05	9.4025		Glycosyltransferase family 28
17360-D_F1BEJMU02HXD1T_170	2A	3411802	12985497	TraesCS2A02G028300	MGBJ	FASTmrEMMA	1.68e-06	0.0163337	5.0007		Agenet domain
					MGBJ	FASTmrMLM	1.11e-06	0.00539083	3.639		Agenet domain
					MGBJ	pLARmEB	9.6e-06	0.0155287	2.3081		Agenet domain
79083-wsnp_Ex_rep_c103167_88182254	2A	8789232	33044691	TraesCS2A02G074700	TDBG1	mrMLM	1.02e-05	0.0246393	2.8054		Dihydrolipoamide acetyltransferase component of pyruvate dehydrogenase complex
69592-Tdurum_contig28682_120	2A	17652561	101381504	TraesCS2A02G153400	MBRJ	pKWmEB	5.25e-06	0.010191	6.7993		Low temperature viability protein Ltv1
80648-wsnp_Ku_c6826_11860405	2A	18148801	104876095	TraesCS2A02G157900	TJBJ	pKWmEB	6.55e-08	0.000317874	4.6366		Tetratricopeptide-like helical domain	Pentatricopeptide repeat
21864-Excalibur_c11398_913	2A	19047720	118446604	TraesCS2A02G165800	MGBJ	mrMLM	4.53e-05	0.03996	4.3625	1	Protein kinase domain	Serine/threonine-protein kinase, active site
59043-RAC875_c54588_191	2A	30457856	393113820	TraesCS2A02G256400	TJBJ	RTM	1.79e-06	0.00679729	0	1	Uncharacterized GPI-anchored protein At1g61900-lke
9450-BS00065105_51	2B	13160891	69648893	TraesCS2B02G109100	MGBJ	mrMLM	1.12e-05	0.0135606	5.5708
23783-Excalibur_c22285_762	2B	41900269	493986458	TraesCS2B02G347100	MBDS	mrMLM	5.8e-08	9.38e-05	3.2345		RNA-dependent RNA polymerase
34658-IAAV3067	2B	59986040	699173434	TraesCS2B02G505000	TJBJ	pKWmEB	1.57e-06	0.00254351	2.6035		Divalent ion tolerance protein, CutA	Nitrogen regulatory PII-like, alpha/beta
1208-BobWhite_c18678_95	2B	65768257	751257597	TraesCS2B02G556100	TJBJ	pKWmEB	1.69e-07	0.000410795	9.0453		DNA-directed DNA polymerase, family A, palm domain	Ribonuclease H-like
32025-GENE-0674_105	2D	4280949	13773809	TraesCS2D02G037000	TDBG1	pLARmEB	3.64e-05	0.0442176	5.4477
49685-Kukri_rep_c115699_270	2D	10389133	39829875	TraesCS2D02G090100	TDBG2	FASTmrEMMA	2.37e-06	0.0114989	5.7801	1	Serpin superfamily
15256-D_contig03226_643	2D	21168132	130822442	TraesCS2D02G185600	MBRJ	FASTmrMLM	3.4e-05	0.0413138	1.3702		NAD-dependent epimerase/dehydratase	NAD(P)-binding domain superfamily
					MBRJ	pLARmEB	4.23e-05	0.0456187	0.6337		NAD-dependent epimerase/dehydratase	NAD(P)-binding domain superfamily
36072-IACX5941	2D	56989423	588793333	TraesCS2D02G489900	MGBJ	pKWmEB	6.36e-08	0.0001234	6.2285		Adenosylhomocysteinase
					MGBJ	pLARmEB	1.77e-05	0.0215326	1.9015		Adenosylhomocysteinase
75000-tplb0052b23_2493	2D	63093449	621964724	TraesCS2D02G545300	TDBG2	RTM	2.25e-05	0.056958	4.67095	1	Leucine-rich repeat domain superfamily	NB-ARC, coiled-coil domain, P-loop NTPase
					TDBG1	FASTmrEMMA	3.94e-07	0.00191054	6.2333	1	Leucine-rich repeat domain superfamily	NB-ARC, coiled-coil domain, P-loop NTPase
					TDBG1	pKWmEB	9.57e-09	9.29e-05	5.2555	1	Leucine-rich repeat domain superfamily	NB-ARC, coiled-coil domain, P-loop NTPase
					TDBG1	pLARmEB	2.25e-07	0.00218215	2.9895	1	Leucine-rich repeat domain superfamily	NB-ARC, coiled-coil domain, P-loop NTPase
23770-Excalibur_c22201_907	2D	66392054	638613120	TraesCS2D02G573500	TDBG1	pKWmEB	9.59e-06	0.0155072	6.1587
					TDBG1	ISIS EM-BLASSO	2.07e-06	0.00503182	3.925
64223-RFL_Contig3121_1979	2D	68977727	648470008	TraesCS2D02G595000	MBDS	pKWmEB	2.02e-05	0.0391215	5.8499	1	Leucine-rich repeat domain superfamily	Protein kinase-like domain
68735-Tdurum_contig18471_456	3A	12271225	75030422	TraesCS3A02G109100	MBDS	mrMLM	2.34e-07	0.000324	34.6452	1	F-box-like domain
66940-Tdurum_contig11121_997	3A	35206706	532448246	TraesCS3A02G297700	MBRJ	mrMLM	6.92e-07	0.0022397	4.5832		Lipoyl synthase, mitochondrial	Aldolase-type TIM barrel, Radical SAM
45125-Kukri_c41296_172	3A	39136445	576209128	TraesCS3A02G331500	MBRJ	mrMLM	7.88e-07	0.00191117	2.2677	1	Proteinase inhibitor I25, cystatin
18893-D_GCE8AKX02HMJXL_374	3B	3636964	15138756	TraesCS3B02G032600	MBDS	MLM	2.13e-07	0.00207	12.554	1	Jacalin-like lectin domain
					MBDS	pKWmEB	2.53e-10	2.46e-06	5.4365	1	Jacalin-like lectin domain
					MBDS	FASTmrEMMA	2.13e-06	0.00690111	4.0071	1	Jacalin-like lectin domain
					MBDS	ISIS EM-BLASSO	8.31e-06	0.0269	2.9122	1	Jacalin-like lectin domain
					MBDS	pLARmEB	2.16e-07	0.000261634	2.4744	1	Jacalin-like lectin domain
					MBDS	mrMLM	7.76e-09	3.76e-05	1.8641	1	Jacalin-like lectin domain
					MBRJ	pKWmEB	4.18e-07	0.0013532	3.0155	1	Jacalin-like lectin domain
					MBRJ	ISIS EM-BLASSO	2.08e-06	0.00673077	2.9764	1	Jacalin-like lectin domain
					MGBJ	pKWmEB	2.35e-05	0.0253129	1.5291	1	Jacalin-like lectin domain
34803-IAAV3924	3B	4638891	20450624	TraesCS3B02G041300	TDBG2	pKWmEB	5.41e-07	0.00131349	6.79	1	Leucine-rich repeat domain superfamily	NB-ARC, coiled-coil domain, P-loop NTPase
3061-BobWhite_c39480_122	3B	8083971	43274832	TraesCS3B02G071700	MBDS	mrMLM	3.66e-06	0.00395	2.0888		Mitochondrial glycoprotein
					TJBJ	mrMLM	1.19e-05	0.0230846	4.6033		Mitochondrial glycoprotein
40913-Kukri_c12869_154	3B	16265564	130647769	TraesCS3B02G142700	TDBG1	mrMLM	1.57e-09	1.53e-05	27.9001	1	F-box-like domain
54100-RAC875_c15509_436	3B	25278634	283604560	TraesCS3B02G222400	MGBJ	FASTmrMLM	2.08e-06	0.00671993	4.8378		RNA-binding, CRM domain	RNA-binding, CRM domain
8908-BS00062734_51	3B	40260670	545069001	TraesCS3B02G339000	TDBG1	RTM	8.79e-13	6.68e-09	12.3398		Lipoyl synthase	Aldolase-type TIM barrel
					MGBJ	RTM	2.17e-09	1.65e-05	8.51868		Lipoyl synthase	Aldolase-type TIM barrel
63403-RAC875_s108395_60	3B	45393728	605267456	TraesCS3B02G385100	TDBG2	mrMLM	1.5e-07	0.00145459	3.7159		IQ motif, EF-hand binding site
					TJBJ	mrMLM	2.79e-06	0.0090323	2.5199		IQ motif, EF-hand binding site
7087-BS00022441_51	3B	67369199	807288990	TraesCS3B02G577200	MBRJ	FASTmrMLM	2.19e-06	0.00424342	5.1645		Target SNARE coiled-coil homology	Syntaxin 6, N-terminal
					MBRJ	RTM	2.73e-05	0.0345894	3.82864		Target SNARE coiled-coil homology	Syntaxin 6, N-terminal
					MBRJ	pLARmEB	2.38e-06	0.00385598	2.3637		Target SNARE coiled-coil homology	Syntaxin 6, N-terminal
					MGBJ	pKWmEB	8.51e-06	0.0118029	3.8733		Target SNARE coiled-coil homology	Syntaxin 6, N-terminal
					TJBJ	pLARmEB	6.69e-07	0.0032453	5.2274		Target SNARE coiled-coil homology	Syntaxin 6, N-terminal
24328-Excalibur_c25515_95	3D	7067399	28331100	TraesCS3D02G064200	MBDS	FASTmrEMMA	4.13e-09	4.01e-05	4.823	1	Protein kinase-like domain	Serine/threonine-protein kinase
					TJBJ	ISIS EM-BLASSO	1.08e-08	0.000104903	7.6898	1	Protein kinase-like domain	Serine/threonine-protein kinase
					TJBJ	pKWmEB	1.56e-07	0.000504851	6.5747	1	Protein kinase-like domain	Serine/threonine-protein kinase
					TJBJ	pLARmEB	2.26e-07	0.00219728	5.241	1	Protein kinase-like domain	Serine/threonine-protein kinase
					TJBJ	FASTmrMLM	3.73e-06	0.00906202	5.2141	1	Protein kinase-like domain	Serine/threonine-protein kinase
					TJBJ	FASTmrEMMA	3e-06	0.0291061	4.4751	1	Protein kinase-like domain	Serine/threonine-protein kinase
15576-D_contig10567_587	3D	18712927	141408492	TraesCS3D02G167100	MBDS	MLM	8.88e-06	0.0287	6.21	1	Glycoside hydrolase	Beta-amylase
12255-BS00105800_51	3D	62756272	611558374	TraesCS3D02G539900	MBRJ	pKWmEB	2.58e-07	0.00125013	11.1928		Inorganic pyrophosphatase
27771-Excalibur_c57945_355	4A	9819250	94765437	TraesCS4A02G088800	TDBG1	pKWmEB	4.87e-07	0.00157603	8.185		E3 Ubiquitin-protein Ligase
72073-Tdurum_contig50388_343	4A	24305775	499345041	TraesCS4A02G206200	TDBG1	mrMLM	5.22e-06	0.016895	2.271	1	Protein kinase-like domain	Serine/threonine-protein kinase
7448-BS00023151_51	4A	36979330	606586747	TraesCS4A02G316900	MGBJ	ISIS EM-BLASSO	3.7e-05	0.0359241	2.7682
76797-wsnp_Ex_c16175_24619793	4A	37445211	609805169	TraesCS4A02G321300	TDBG1	ISIS EM-BLASSO	6.91e-07	0.0033524	3.7361		RST domain of plant	Poly(ADP-ribose) polymerase
					MBDS	pKWmEB	1.01e-06	0.00491762	4.1271		RST domain of plant	Poly(ADP-ribose) polymerase
71854-Tdurum_contig47858_908	4A	40461607	625249359	TraesCS4A02G346600	MGBJ	mrMLM	3.81e-06	0.0092422	1.4934	1	F-box-like domain	Leucine-rich repeat domain superfamily
59451-RAC875_c59673_500	4A	47586766	681670895	TraesCS4A02G408900	TDBG2	mrMLM	2.5e-06	0.00605625	3.317		Cytoplasmic FMR1-interacting
57805-RAC875_c42019_60	4B	31949511	538268580	TraesCS4B02G266300	MBRJ	mrMLM	1.18e-10	1.15e-06	14.4676
11789-BS00093089_51	4B	32945077	552827949	TraesCS4B02G274900	TDBG1	FASTmrEMMA	7.23e-09	7.01e-05	13.8227		Peptidase S8 propeptide/proteinase inhibitor I9 superfamily	Subtilisin-like protease, fibronectin type-III domain
40320-Kukri_c10321_228	4B	34791181	577655390	TraesCS4B02G292100	MBDS	FASTmrEMMA	2.32e-08	0.000112411	9.9404		Carbon-nitrogen hydrolase superfamily
					MBDS	mrMLM	4.36e-09	4.24e-05	6.9563		Carbon-nitrogen hydrolase superfamily
					TJBJ	mrMLM	2.29e-07	0.0011108	9.1275		Carbon-nitrogen hydrolase superfamily
38863-Ku_c2346_1339	4B	39423969	623066948	TraesCS4B02G332500	TDBG2	mrMLM	6.91e-06	0.0111804	4.7875		Fatty acid hydroxylase
					TJBJ	pKWmEB	9.73e-11	9.44e-07	10.4633		Fatty acid hydroxylase
					TJBJ	FASTmrMLM	4.39e-06	0.00852737	6.1045		Fatty acid hydroxylase
					TJBJ	pLARmEB	1.88e-05	0.0365861	4.5639		Fatty acid hydroxylase
16427-D_contig29825_215	4D	11840744	82020798	TraesCS4D02G103400	TDBG2	pKWmEB	1.98e-08	6.4e-05	10.9507	1	Leucine-rich repeat domain superfamily	NB-ARC, coiled-coil domain, P-loop NTPase
					TDBG2	pLARmEB	2.16e-06	0.0069914	5.066	1	Leucine-rich repeat domain superfamily	NB-ARC, coiled-coil domain, P-loop NTPase
					TDBG1	FASTmrMLM	2.28e-08	0.000221608	11.1523	1	Leucine-rich repeat domain superfamily	NB-ARC, coiled-coil domain, P-loop NTPase
					TDBG1	pLARmEB	2.95e-07	0.00143237	8.1715	1	Leucine-rich repeat domain superfamily	NB-ARC, coiled-coil domain, P-loop NTPase
					MBRJ	RTM	1.63e-05	0.0413809	4.8331	1	Leucine-rich repeat domain superfamily	NB-ARC, coiled-coil domain, P-loop NTPase
					MBRJ	pLARmEB	1.68e-05	0.0204266	3.8302	1	Leucine-rich repeat domain superfamily	NB-ARC, coiled-coil domain, P-loop NTPase
28179-Excalibur_c63208_105	4D	24971441	358039232	TraesCS4D02G208000	MGBJ	mrMLM	5.98e-05	0.0446466	4.3884		E3 Ubiquitin-protein Ligase
17554-D_F5XZDLF01DBHUA_161	4D	39554039	496649455	TraesCS4D02G338700	TDBG2	pKWmEB	2.49e-05	0.0402378	3.0306	1	Aspartic peptidase domain	Xylanase inhibitor
					TDBG2	pLARmEB	1.28e-07	0.00124132	2.5515	1	Aspartic peptidase domain	Xylanase inhibitor
36264-IACX8002	5A	32671079	485201265	TraesCS5A02G275800	TDBG2	mrMLM	1.56e-05	0.0216232	3.6109
61301-RAC875_c9984_1003	5A	45300674	585458451	TraesCS5A02G390000	TDBG1	pKWmEB	6.8e-07	0.00165054	8.719	1	P-loop containing nucleoside triphosphate hydrolase	Kinesin motor domain
75749-wsnp_BJ224975A_Ta_2_2	5A	45586083	588737306	TraesCS5A02G392500	TDBG2	RTM	4.39e-06	0.0166828	5.41533	1	Protein kinase superfamily protein	Protein kinase, ATP binding site
41702-Kukri_c17055_189	5A	45592178	588742167	TraesCS5A02G392600	TDBG2	RTM	4.39e-06	0.0166828	5.41533	1	ABC transporter type 1, transmembrane domain superfamily	P-loop NTPase
59300-RAC875_c57603_144	5A	57209477	666228776	TraesCS5A02G499900	MBRJ	RTM	9.6e-07	0.00365254	5.79553		EF-hand domain pair, Riboflavin synthase-like beta-barrel	Ferredoxin-NADP reductase (FNR), nucleotide-binding domain
					MBRJ	FASTmrMLM	1.43e-08	6.94e-05	5.1283		EF-hand domain pair, Riboflavin synthase-like beta-barrel	Ferredoxin-NADP reductase (FNR), nucleotide-binding domain
					MBRJ	ISIS EM-BLASSO	5.53e-07	0.00268383	4.307		EF-hand domain pair, Riboflavin synthase-like beta-barrel	Ferredoxin-NADP reductase (FNR), nucleotide-binding domain
					MBRJ	FASTmrEMMA	2.3e-06	0.0111726	3.7729		EF-hand domain pair, Riboflavin synthase-like beta-barrel	Ferredoxin-NADP reductase (FNR), nucleotide-binding domain
					MBRJ	pLARmEB	3.77e-08	0.000183128	2.2175		EF-hand domain pair, Riboflavin synthase-like beta-barrel	Ferredoxin-NADP reductase (FNR), nucleotide-binding domain
4426-BobWhite_c8115_648	5A	59636933	682712749	TraesCS5A02G521500	MGBJ	pKWmEB	8.95e-08	0.000144755	5.7942		UAA transporter
7730-BS00029462_51	5A	59649678	682898385	TraesCS5A02G521600	MBDS	MLM	1.42e-05	0.0344	7.778		Terpenoid cyclases/protein prenyltransferase alpha-alpha toroid	Isoprenoid synthase domain
					MGBJ	pLARmEB	2.42e-13	2.35e-09	4.7393		Terpenoid cyclases/protein prenyltransferase alpha-alpha toroid	Isoprenoid synthase domain
					MGBJ	ISIS EM-BLASSO	4.79e-09	4.65e-05	4.4704		Terpenoid cyclases/protein prenyltransferase alpha-alpha toroid	Isoprenoid synthase domain
					MGBJ	pKWmEB	4.27e-08	0.000103711	4.3711		Terpenoid cyclases/protein prenyltransferase alpha-alpha toroid	Isoprenoid synthase domain
					MGBJ	FASTmrEMMA	5.84e-06	0.0283501	3.2858		Terpenoid cyclases/protein prenyltransferase alpha-alpha toroid	Isoprenoid synthase domain
					MGBJ	FASTmrMLM	1.73e-05	0.0335363	2.7446		Terpenoid cyclases/protein prenyltransferase alpha-alpha toroid	Isoprenoid synthase domain
					TJBJ	mrMLM	5.37e-06	0.013036	2.3976		Terpenoid cyclases/protein prenyltransferase alpha-alpha toroid	Isoprenoid synthase domain
9144-BS00063855_51	5B	60041146	685964650	TraesCS5A02G525700	MBRJ	mrMLM	2.85e-05	0.0251406	0.6627	1	F-box-like domain
69406-Tdurum_contig28001_110	5A	62393984	700619759	TraesCS5A02G546500	MBRJ	mrMLM	4.77e-06	0.00578661	3.6635		CAAX prenyl protease 2
51347-Ra_c19198_137	5B	3351931	26916277	TraesCS5B02G027800	MGBJ	ISIS EM-BLASSO	7.46e-07	0.00241248	3.0859
1854-BobWhite_c2479_214	5B	8005367	78420589	TraesCS5B02G068700	TDBG1	ISIS EM-BLASSO	1.03e-06	0.00332326	6.231		Cobalamin (vitamin B12) biosynthesis CbiX
					TDBG1	pLARmEB	4.79e-06	0.00929426	4.4473		Cobalamin (vitamin B12) biosynthesis CbiX
72519-Tdurum_contig56538_337	5B	11150978	124636878	TraesCS5B02G094700	TDBG1	FASTmrMLM	1.72e-05	0.0208303	3.2235
					TJBJ	FASTmrMLM	1.9e-06	0.00613288	4.9532
35222-IAAV6616	5B	27700285	397673282	TraesCS5B02G222600	MBRJ	mrMLM	5.22e-05	0.0422633	1.216	1	P-loop NTPase	Kinesin motor domain
					MGBJ	pKWmEB	3.52e-08	0.000114016	3.0636	1	P-loop NTPase	Kinesin motor domain
					MGBJ	mrMLM	6.47e-05	0.0448893	2.3432	1	P-loop NTPase	Kinesin motor domain
					MGBJ	pLARmEB	9.21e-08	0.000223422	2.0203	1	P-loop NTPase	Kinesin motor domain
					MGBJ	ISIS EM-BLASSO	4.44e-05	0.0391465	1.3979	1	P-loop NTPase	Kinesin motor domain
75518-wsnp_BE495277B_Ta_2_5	5B	35998994	479388707	TraesCS5B02G295600	MBRJ	RTM	4.31e-05	0.0468281	6.55036
45559-Kukri_c45713_151	5B	36081425	479716557	TraesCS5B02G296500	MBRJ	RTM	4.31e-05	0.0468281	6.55036		Solute carrier family 35 member
34690-IAAV3268	5B	36882646	488107093	TraesCS5B02G303800	MBRJ	mrMLM	2.56e-06	0.00354727	1.784	1	Alcohol dehydrogenase	GroES-like superfamily, Polyketide synthase, enoylreductase domain
63448-RAC875_s116069_221	5B	38928763	506951332	TraesCS5B02G321900	TDBG2	pKWmEB	2.96e-11	2.88e-07	7.1829	1	Serine/threonine-protein kinase	Protein kinase-like domain
					MGBJ	pKWmEB	1.19e-05	0.0143846	2.693	1	Serine/threonine-protein kinase	Protein kinase-like domain
81257-wsnp_Ra_c8465_14340896	5B	43019489	539293955	TraesCS5B02G359500	TJBJ	mrMLM	1.48e-10	1.43e-06	6.5069		Tetratricopeptide-like helical domain	PB1 domain
34530-IAAV2296	5B	46348200	566686138	TraesCS5B02G387600	TJBJ	ISIS EM-BLASSO	1.83e-05	0.0443328	3.5521		Tetratricopeptide-like helical domain	PB1 domain
74020-Tdurum_contig97942_163	5B	64940412	701174382	TraesCS5B02G549200	TDBG1	ISIS EM-BLASSO	9.73e-06	0.018898	2.8374		Mitochondrial substrate/solute carrier
18809-D_GCE8AKX01CE518_452	5D	24006533	302353075	TraesCS5D02G199800	MGBJ	mrMLM	3.64e-07	0.00176789	1.018		Molybdopterin synthase catalytic subunit
48181-Kukri_c8949_906	5D	29344468	354938992	TraesCS5D02G247600	MBRJ	mrMLM	8.14e-07	0.00157946	NA		Protein transport protein SEC23	Zinc finger, Sec23/Sec24-type
15938-D_contig18780_204	5D	49314995	486259068	TraesCS5D02G429000	TDBG2	FASTmrEMMA	1.81e-10	1.76e-06	9.2631	1	Leucine-rich repeat domain superfamily	NB-ARC, coiled-coil domain, P-loop NTPase
10557-BS00071571_51	6A	541913	1879563	TraesCS6A02G004500	MGBJ	ISIS EM-BLASSO	2.43e-05	0.0261663	2.7435	1	Serine/threonine-protein kinase	Protein kinase-like domain
					MGBJ	pLARmEB	9.78e-06	0.0135671	2.2532	1	Serine/threonine-protein kinase	Protein kinase-like domain
78974-wsnp_Ex_c965_1845676	6A	41299205	581747079	TraesCS6A02G349200	MGBJ	mrMLM	1.86e-05	0.020033	3.0846		Cyclic nucleotide-binding domain	RmlC-like jelly roll fold
63713-RFL_Contig1715_631	6A	44163966	597292476	TraesCS6A02G374500	MBRJ	FASTmrMLM	1.03e-06	0.00249647	2.7398		GNAT domain	Acyl-CoA N-acyltransferase
					MBRJ	pLARmEB	7.23e-08	0.000175398	1.4981		GNAT domain	Acyl-CoA N-acyltransferase
14865-CAP8_c6448_265	6A	45814954	604882706	TraesCS6A02G389200	MBDS	pKWmEB	1.35e-05	0.0326907	6.21
18412-D_GBF1XID01EGI95_65	6B	5016981	25279886	TraesCS6B02G040900	TDBG2	FASTmrMLM	1.39e-05	0.0449638	6.0931		Peptidase S8 propeptide/proteinase inhibitor	Peptidase S8/S53 domain superfamily, subtilisin, Ser-active site
					TDBG2	pLARmEB	1.78e-05	0.0345235	3.5335		Peptidase S8 propeptide/proteinase inhibitor	Peptidase S8/S53 domain superfamily, subtilisin, Ser-active site
					TJBJ	FASTmrMLM	8.29e-07	0.00804795	5.4703		Peptidase S8 propeptide/proteinase inhibitor	Peptidase S8/S53 domain superfamily, subtilisin, Ser-active site
					TJBJ	pLARmEB	2.56e-06	0.00828444	4.0346		Peptidase S8 propeptide/proteinase inhibitor	Peptidase S8/S53 domain superfamily, subtilisin, Ser-active site
					TJBJ	ISIS EM-BLASSO	1.46e-05	0.0472022	3.9591		Peptidase S8 propeptide/proteinase inhibitor	Peptidase S8/S53 domain superfamily, subtilisin, Ser-active site
81123-wsnp_Ra_c3766_6947263	6B	18047868	151130562	TraesCS6B02G149800	MBDS	RTM	8.93e-07	0.00678972	6.59463	1	ZTL, PAS domain, PAS domain	Galactose oxidase/kelch, beta-propeller
44910-Kukri_c39321_112	6B	18048837	151131531	TraesCS6B02G149800	TDBG2	pKWmEB	1.01e-08	4.91e-05	11.3228	1	ZTL, PAS domain, PAS domain	Galactose oxidase/kelch, beta-propeller
					MBDS	RTM	8.93e-07	0.00678972	6.59463	1	ZTL, PAS domain, PAS domain	Galactose oxidase/kelch, beta-propeller
					MBDS	pLARmEB	4.05e-05	0.0357678	3.759	1	ZTL, PAS domain, PAS domain	Galactose oxidase/kelch, beta-propeller
					TJBJ	pKWmEB	4.48e-07	0.000870192	6.7134	1	ZTL, PAS domain, PAS domain	Galactose oxidase/kelch, beta-propeller
5404-BobWhite_rep_c63804_353	6B	31156326	451926960	TraesCS6B02G251800	TDBG2	pLARmEB	8.32e-07	0.00403976	4.6858
76118-wsnp_CD452643B_Ta_2_1	6B	32588153	474177746	TraesCS6B02G263200	TDBG2	mrMLM	3.16e-07	0.00153507	4.7584	1	Alcohol dehydrogenase	GroES-like superfamily, Signal transduction histidine kinase
					TDBG2	ISIS EM-BLASSO	3.89e-06	0.0377472	4.1546	1	Alcohol dehydrogenase	GroES-like superfamily, Signal transduction histidine kinase
					TDBG1	FASTmrMLM	2.51e-07	0.00121662	3.8575	1	Alcohol dehydrogenase	GroES-like superfamily, Signal transduction histidine kinase
20105-Ex_c20946_574	6B	33247778	481863585	TraesCS6B02G268200	MBRJ	mrMLM	1.38e-05	0.0148407	3.1863	1	Zinc finger, CCHC-type	Zinc finger, RING/FYVE/PHD-type
28858-Excalibur_c7785_123	6B	36116504	526481172	TraesCS6B02G292700	MBRJ	ISIS EM-BLASSO	3.56e-06	0.0086462	2.5374	1	F-box-like domain
404-BobWhite_c12770_158	6B	36284936	528622948	TraesCS6B02G294500	MBRJ	FASTmrMLM	5.25e-09	5.1e-05	5.4868
					MBRJ	pLARmEB	4.59e-08	0.00014841	2.2374
72452-Tdurum_contig55473_989	6B	40385382	582823808	TraesCS6B02G331400	TJBJ	RTM	1.12e-09	8.52e-06	11.1484		CRAL-TRIO lipid binding domain
72450-Tdurum_contig55473_381	6B	40386543	582824969	TraesCS6B02G331400	TJBJ	RTM	1.12e-09	8.52e-06	11.1484		CRAL-TRIO lipid binding domain
8425-BS00046264_51	6B	52998819	704974282	TraesCS6B02G439600	TDBG1	FASTmrMLM	1.29e-06	0.00250043	3.0795	1	Ethylene receptor	Signal transduction histidine kinase, HSP90-like ATPase
48184-Kukri_c89555_57	6D	1241716	3917522	TraesCS6D02G010200	MGBJ	ISIS EM-BLASSO	4.46e-06	0.00721164	4.4203
44590-Kukri_c3664_1071	6D	3333799	10910854	TraesCS6D02G028200	MGBJ	mrMLM	5.88e-10	5.71e-06	6.8225	1	Winged helix DNA-binding domain	P-loop NTPase, AAA+ ATPase domain, Sec63 domain
9598-BS00065628_51	6D	8903806	40773214	TraesCS6D02G076300	MBRJ	pKWmEB	3.02e-06	0.00732024	2.8796	1	F-box-like domain
18070-D_GB5Y7FA02G6KBX_382	6D	29082978	339399173	TraesCS6D02G239000	MBRJ	RTM	1.69e-05	0.0322093	3.6141
14891-CAP8_c6799_93	6D	45185823	462632139	TraesCS6D02G384200	MBRJ	pKWmEB	2.5e-08	0.000242876	10.7029		Aconitase/3-isopropylmalate dehydratase large subunit	Aconitase/Iron-responsive element-binding protein 2
62295-RAC875_rep_c114991_493	7A	5042920	19006634	TraesCS7A02G040900	MBRJ	FASTmrMLM	1.8e-08	5.83e-05	4.9298		Sucrose synthase
					MBRJ	ISIS EM-BLASSO	5.54e-06	0.010765	2.8473		Sucrose synthase
					MBRJ	pLARmEB	3e-08	0.000291598	2.2208		Sucrose synthase
25092-Excalibur_c31383_82	7A	7627239	31879084	TraesCS7A02G063700	TDBG2	FASTmrMLM	2.22e-06	0.0107933	7.9827		MFS transporter	SPX domain
28748-Excalibur_c7538_2718	7A	8279179	35602223	TraesCS7A02G069600	TDBG1	FASTmrMLM	3.53e-05	0.0342993	1.0957	1	Leucine-rich repeat domain superfamily	NB-ARC, coiled-coil domain, P-loop NTPase
					MGBJ	mrMLM	1.11e-05	0.0153565	1.2144	1	Leucine-rich repeat domain superfamily	NB-ARC, coiled-coil domain, P-loop NTPase
55491-RAC875_c23339_236	7A	9877239	48094405	TraesCS7A02G083400	TDBG1	pKWmEB	5.4e-06	0.0104741	7.4292		Leucine carboxyl methyltransferase
60067-RAC875_c67063_703	7A	18373820	112265416	TraesCS7A02G158000	MBDS	pLARmEB	2.95e-05	0.0286276	2.5661	1	DNA-binding domain	AP2/ERF domain
60997-RAC875_c90330_82	7A	64009713	721224063	TraesCS7A02G545200	TJBJ	ISIS EM-BLASSO	1.22e-06	0.00591637	4.0279		Rhodanese-like domain superfamily
23174-Excalibur_c18631_169	7A	66024320	733332972	TraesCS7A02G562600	TDBG1	FASTmrMLM	2.56e-06	0.00355129	2.3857	1	Peptidase S9A, N-terminal domain	Alpha/Beta hydrolase
27109-Excalibur_c50044_749	7B	1288042	6179392	TraesCS7B02G010100	TDBG2	FASTmrMLM	1.63e-06	0.0158667	7.1181		Q motif, EF-hand binding site
					TDBG1	FASTmrMLM	5.6e-07	0.00135996	7.493		Q motif, EF-hand binding site
					TDBG1	pLARmEB	9.97e-07	0.00322525	4.741		Q motif, EF-hand binding site
					TJBJ	FASTmrMLM	1.72e-06	0.00833593	6.4258		Q motif, EF-hand binding site
					TJBJ	pLARmEB	1.16e-05	0.0282568	4.1268		Q motif, EF-hand binding site
79153-wsnp_Ex_rep_c109138_92064554	7B	38253859	560531289	TraesCS7B02G313700	TDBG2	RTM	5.26e-12	4e-08	14.722		Conserved hypothetical protein CHP01589, plant
20908-Ex_c54863_29	7B	38327914	561748617	TraesCS7B02G314400	TDBG2	RTM	5.26e-12	4e-08	14.722	1	Zinc finger, TAZ-type, ZZ-type	Zinc finger, FYVE/PHD-type
10797-BS00075332_51	7B	42859676	611615637	TraesCS7B02G353800	MGBJ	pKWmEB	5.71e-09	2.77e-05	4.8769	1	Leucine-rich repeat domain superfamily	Protein kinase-like domain, coiled-coil domain, P-loop NTPase
3028-BobWhite_c39053_78	7B	42902200	611743356	TraesCS7B02G354000	MBRJ	mrMLM	8.56e-08	0.000415594	3.5697		Ubiquitin-like domain
					MGBJ	pLARmEB	5.4e-10	2.62e-06	3.648		Ubiquitin-like domain
					MGBJ	ISIS EM-BLASSO	1.38e-05	0.0191464	2.3106		Ubiquitin-like domain
5025-BobWhite_rep_c52876_72	7B	42924531	612257379	TraesCS7B02G354200	TDBG1	FASTmrMLM	3.53e-05	0.0380753	3.6437		Ubiquitin-like domain
					TDBG1	pLARmEB	1.22e-05	0.019794	3.6229		Ubiquitin-like domain
56081-RAC875_c27548_417	7B	44078960	626239007	TraesCS7B02G363900	TDBG2	pLARmEB	3.68e-06	0.00892534	3.2247	1	Zinc finger, RING-CH-type	Zinc finger, RING/FYVE/PHD-type
9018-BS00063208_51	7B	45012101	637618402	TraesCS7B02G371600	MGBJ	mrMLM	5.64e-05	0.045648	5.4099	1	Leucine-rich repeat domain superfamily	F-box-like domain
					MGBJ	ISIS EM-BLASSO	1.46e-05	0.0177253	3.4977	1	Leucine-rich repeat domain superfamily	F-box-like domain
73054-Tdurum_contig67161_99	7B	52675393	703310984	TraesCS7B02G437100	TJBJ	pLARmEB	2.64e-05	0.0427399	1.8523		LIM-domain binding protein/SEUSS
19354-D_GDS7LZN02F1Q5F_180	7D	8876753	45129712	TraesCS7D02G076400	TDBG1	mrMLM	1.79e-05	0.0290286	9.1464		3-ketoacyl-CoA synthase	3-Oxoacyl-[acyl-carrier-protein (ACP)] synthase III
					MGBJ	mrMLM	3.78e-06	0.0122315	14.2699		3-ketoacyl-CoA synthase	3-Oxoacyl-[acyl-carrier-protein (ACP)] synthase III
					MGBJ	FASTmrMLM	3.55e-07	0.00344656	9.3264		3-ketoacyl-CoA synthase	3-Oxoacyl-[acyl-carrier-protein (ACP)] synthase III
					TJBJ	pKWmEB	6.48e-06	0.00899057	14.0191		3-ketoacyl-CoA synthase	3-Oxoacyl-[acyl-carrier-protein (ACP)] synthase III
42140-Kukri_c19466_627	7D	11431983	59936619	TraesCS7D02G099900	MGBJ	pKWmEB	3.77e-15	3.66e-11	18.8084	1	Leucine-rich repeat domain superfamily	NB-ARC, coiled-coil domain, P-loop NTPase
					MGBJ	pLARmEB	6.76e-06	0.0131255	4.7748	1	Leucine-rich repeat domain superfamily	NB-ARC, coiled-coil domain, P-loop NTPase
					MGBJ	RTM	7.71e-06	0.0293231	4.34372	1	Leucine-rich repeat domain superfamily	NB-ARC, coiled-coil domain, P-loop NTPase
55515-RAC875_c23473_165	7D	13138190	70126657	TraesCS7D02G114700	MGBJ	mrMLM	5.1e-06	0.00989615	6.8767
52752-Ra_c8680_450	7D	17448451	101475229	TraesCS7D02G153000	TDBG1	mrMLM	2.86e-06	0.0138908	15.987		Nucleoporin
15734-D_contig14443_745	7D	29487395	232496636	TraesCS7D02G257100	TDBG1	MLM	4.13e-06	0.0401	6.547		Ribosomal protein L32e
					TDBG1	pKWmEB	2.05e-07	0.000993929	4.571		Ribosomal protein L32e
					TDBG1	FASTmrMLM	3.86e-07	0.00124987	2.4668		Ribosomal protein L32e
					TDBG1	pLARmEB	1.53e-06	0.00370531	1.9356		Ribosomal protein L32e
72568-Tdurum_contig5724_344	7D	55472396	587733069	TraesCS7D02G475600	TDBG1	FASTmrMLM	1.66e-06	0.00269298	3.7114	1	Aspartic peptidase domain	Xylanase inhibitor
					TDBG1	pLARmEB	1.29e-05	0.017852	2.4265	1	Aspartic peptidase domain	Xylanase inhibitor
18377-D_GBF1XID01CATV7_146	7D	57228181	600701805	TraesCS7D02G491200	TJBJ	ISIS EM-BLASSO	1.96e-05	0.0379678	6.2793		Acyl transferase/acyl hydrolase/lysophospholipase	Patatin-like phospholipase domain
15958-D_contig19288_196	7D	60975397	619884620	TraesCS7D02G523200	MBRJ	FASTmrMLM	3.55e-05	0.0383215	3.6209	1	Protein ENHANCED DISEASE RESISTANCE 2, C-terminal	START-like domain superfamily
24279-Excalibur_c25224_202	Un	7586582	51205798	TraesCSU02G065800	MBDS	ISIS EM-BLASSO	8.12e-06	0.0394	2.1543		PPPDE putative peptidase domain
LR SEVERITY - SPRING DIVERSITY PANEL
77798-wsnp_Ex_c3372_6195001	1A	18611297	257573729	TraesCS1A02G150100	SK	ISIS EM-BLASSO	1.24e-07	0.00105065	6.3831	1	Leucine-rich repeat superfamily
					SK	RTM	1.41e-05	0.0296	5.79124	1	Leucine-rich repeat superfamily
25356-Excalibur_c33567_363	1A	29244854	427819541	TraesCS1A02G240600	SK	mrMLM	3.7e-05	0.0448868	17.6149	1	Zinc finger, FYVE/PHD-type	Regulator of chromosome condensation, RCC1
45449-Kukri_c44500_315	1A	51373780	586952125	TraesCS1A02G437400	All locations	mrMLM	1.2e-05	0.0127706	7.4277
79341-wsnp_Ex_rep_c67474_66076379	1A	51947254	591093391	TraesCS1A02G442400	OTT	FASTmrMLM	7.72e-08	0.000655023	8.8116	1	P-loop NTPase, Armadillo-type fold	Helicase superfamily 1/2, ATP-binding domain
					OTT	pLARmEB	4.72e-10	4.01e-06	9.2034	1	P-loop NTPase, Armadillo-type fold	Helicase superfamily 1/2, ATP-binding domain
7123-BS00022505_51	1B	1051097	4347120	TraesCS1B02G008000	All locations	ISIS EM-BLASSO	8.27e-06	0.0100313	4.943		RNA-binding domain superfamily, MEI2-like, RNA recognition motif	Nucleotide-binding alpha-beta plait domain superfamily
					All locations	pKWmEB	2.19e-07	0.00093095	8.4632		RNA-binding domain superfamily, MEI2-like, RNA recognition motif	Nucleotide-binding alpha-beta plait domain superfamily
					All locations	FASTmrMLM	3.52e-09	9.95e-06	7.2203		RNA-binding domain superfamily, MEI2-like, RNA recognition motif	Nucleotide-binding alpha-beta plait domain superfamily
					All locations	pLARmEB	1.23e-10	5.21e-07	6.8347		RNA-binding domain superfamily, MEI2-like, RNA recognition motif	Nucleotide-binding alpha-beta plait domain superfamily
					All locations	FASTmrEMMA	2.03e-06	0.00573899	5.0673		RNA-binding domain superfamily, MEI2-like, RNA recognition motif	Nucleotide-binding alpha-beta plait domain superfamily
9566-BS00065487_51	1B	2295103	8559397	TraesCS1B02G017600	All locations	RTM	6.86e-05	0.0433	3.17915	1	Leucine-rich repeat domain superfamily	NB-ARC, coiled-coil domain, P-loop NTPase, AAA+ ATPase domain
7076-BS00022429_51	1B	2295454	8559748	TraesCS1B02G017600	All locations	RTM	6.86e-05	0.0433	3.17915	1	Leucine-rich repeat domain superfamily	NB-ARC, coiled-coil domain, P-loop NTPase, AAA+ ATPase domain
47637-Kukri_c75399_226	1B	28482765	408656937	TraesCS1B02G227400	All locations	FASTmrMLM	1.64e-10	6.94e-07	7.217		6-bladed beta-propeller
					MDN	mrMLM	2.72e-05	0.0256448	2.7081		6-bladed beta-propeller
					MDN	pKWmEB	4.87e-09	1.38e-05	6.2428		6-bladed beta-propeller
					MDN	FASTmrMLM	8.99e-07	0.00190808	5.0837		6-bladed beta-propeller
					MDN	pLARmEB	8.2e-06	0.0139151	3.2139		6-bladed beta-propeller
6619-BS00015519_51	1B	52408790	660528121	TraesCS1B02G438100	All locations	pKWmEB	1.78e-05	0.0189307	3.9358	1	Leucine-rich repeat domain superfamily
					All locations	ISIS EM-BLASSO	8.61e-07	0.0018264	2.8998	1	Leucine-rich repeat domain superfamily
28820-Excalibur_c7684_54	1B	52412153	660531484	TraesCS1B02G438100	All locations	ISIS EM-BLASSO	5.25e-06	0.00892045	2.3552	1	Leucine-rich repeat domain superfamily
47907-Kukri_c8211_159	1D	2986206	9875153	TraesCS1D02G023400	MDN	mrMLM	4.66e-05	0.0329568	2.3351		Rab-GTPase-TBC domain superfamily
					MDN	pLARmEB	2.78e-08	7.85e-05	4.7667		Rab-GTPase-TBC domain superfamily
2192-BobWhite_c28341_51	1D	18582539	204295576	TraesCS1D02G148400	SK	RTM	1.41e-05	0.0222	NA		Cyclin-dependent kinase inhibitor
57419-RAC875_c38580_350	1D	45383013	460254487	TraesCS1D02G388100	All locations	FASTmrMLM	4.94e-09	1.05e-05	17.013
31871-GENE-0416_480	1D	48928482	476257353	TraesCS1D02G419300	MDN	pKWmEB	1.09e-05	0.0102971	2.3312
9578-BS00065548_51	2A	21567243	148866377	TraesCS2A02G187200	All locations	RTM	9.72e-07	0.00204	3.87835		Chlorophyll a-b binding protein, chloroplastic
14845-CAP8_c607_659	2A	35161420	504711045	TraesCS2A02G293700	OTT	mrMLM	3.76e-06	0.0106327	2.3088		ATP synthase subunit d
51049-Ra_c13247_528	2A	49404378	675079920	TraesCS2A02G419500	All locations	RTM	5.01e-05	0.0395	1.90467		PAZ domain superfamily	Ribonuclease H-like superfamily
26314-Excalibur_c42248_663	2B	1649760	6715740	TraesCS2B02G013500	All locations	RTM	2.49e-05	0.0224	3.07297
55821-RAC875_c25628_180	2B	2160654	8273044	TraesCS2B02G017800	SK	pLARmEB	3.77e-05	0.0290847	2.6483
					SK	mrMLM	1.81e-06	0.00384482	4.2468
					SK	ISIS EM-BLASSO	1.28e-05	0.027208	3.9429
24825-Excalibur_c2933_1350	2B	2178499	8290437	TraesCS2B02G018100	All locations	pKWmEB	8.99e-06	0.0108983	6.7581		Terpenoid cyclases/protein prenyltransferase alpha-alpha toroid
36726-Jagger_c7188_67	2B	23707426	180561127	TraesCS2B02G201400	MDN	pLARmEB	2.86e-05	0.0404488	2.2566		COBRA-like protein
					MDN	pKWmEB	1.09e-08	2.31e-05	8.6633		COBRA-like protein
					MDN	ISIS EM-BLASSO	2.65e-05	0.0374719	2.8677		COBRA-like protein
76662-wsnp_Ex_c14771_22883575	2B	24791503	191734319	TraesCS2B02G209400	SK	FASTmrMLM	1.28e-05	0.0363442	2.8176
					SK	pKWmEB	1.84e-05	0.0311592	5.6218
					SK	mrMLM	8.81e-06	0.01247	5.2477
					SK	pLARmEB	4.44e-06	0.00538714	3.6469
45381-Kukri_c43745_1935	2B	48645317	578601210	TraesCS2B02G407500	MDN	mrMLM	2.27e-05	0.0275782	2.4466		NAD kinase/diacylglycerol kinase-like domain superfamily	Inorganic polyphosphate/ATP-NAD kinase, N-terminal
4154-BobWhite_c6365_385	2B	63486521	731895391	TraesCS2B02G536100	MDN	mrMLM	6.67e-05	0.0404197	3.4781		Sulphate anion transporter, conserved site	STAS domain superfamily
					MDN	pKWmEB	6.41e-08	0.00010889	6.1443		Sulphate anion transporter, conserved site	STAS domain superfamily
					MDN	ISIS EM-BLASSO	4.58e-08	0.000194503	4.4142		Sulphate anion transporter, conserved site	STAS domain superfamily
					MDN	FASTmrEMMA	1.16e-06	0.00196692	3.8175		Sulphate anion transporter, conserved site	STAS domain superfamily
73196-Tdurum_contig71365_233	2B	64167472	738410414	TraesCS2B02G542000	All locations	pKWmEB	1.55e-06	0.00328319	4.6932
14959-CAP8_c8516_542	2B	65498494	749028333	TraesCS2B02G553600	OTT	mrMLM	1.49e-05	0.0316312	12.2746		Chlorophyll A-B binding protein
46560-Kukri_c55909_1109	2B	68834352	770681399	TraesCS2B02G583300	OTT	pLARmEB	1.16e-05	0.0163721	4.7929	1	WD40-repeat-containing domain superfamily	Tetratricopeptide-like helical domain superfamily
					OTT	FASTmrMLM	9e-07	0.00382144	7.9214	1	WD40-repeat-containing domain superfamily	Tetratricopeptide-like helical domain superfamily
29707-Excalibur_rep_c101288_130	2D	5412507	17169662	TraesCS2D02G046800	OTT	ISIS EM-BLASSO	1.37e-07	0.000583615	7.5658
74411-tplb0030j08_1960	2D	7620762	27928724	TraesCS2D02G066100	MDN	mrMLM	2.56e-07	0.000723168	22.1054		Glucose-6-phosphate 1-dehydrogenase
66898-Tdurum_contig11028_533	2D	16684984	87406015	TraesCS2D02G145500	MDN	pKWmEB	4.6e-05	0.0390083	3.6502	1	Ankyrin repeat-containing domain superfamily
5774-BS00000905_51	2D	34098230	369762241	TraesCS2D02G288600	All locations	pKWmEB	6.68e-07	0.00189119	5.0299
66206-Tdurum_contig10048_447	2D	65490828	635229168	TraesCS2D02G565200	OTT	pKWmEB	2.98e-06	0.00842045	3.4467		P-loop NTPase	DNA mismatch repair protein MutS, core domain
7692-BS00028660_51	3A	32940002	507467861	TraesCS3A02G277800	All locations	mrMLM	2.87e-05	0.0221142	1.1044		ENTH domain
37081-JD_c1636_113	3A	50135525	672556342	TraesCS3A02G429800	MDN	mrMLM	1.2e-06	0.00253707	7.9699		Tetratricopeptide-like helical domain superfamily	Plant specific mitochondrial import receptor subunit TOM20
14695-CAP8_c3568_256	3A	57869333	724200935	TraesCS3A02G498700	SK	pLARmEB	4.02e-06	0.00568598	6.7971	1	Alpha/Beta hydrolase fold	Fungal lipase-like domain
					SK	mrMLM	2.8e-08	0.000237339	9.9815	1	Alpha/Beta hydrolase fold	Fungal lipase-like domain
50704-Kukri_s117946_404	3A	60930664	739734944	TraesCS3A02G526000	OTT	pLARmEB	3.53e-07	0.00149909	4.5992		FLC EXPRESSOR/FLX-like
					OTT	FASTmrMLM	2.73e-06	0.00771144	4.882		FLC EXPRESSOR/FLX-like
65093-RFL_Contig5709_3312	3B	2450304	9780568	TraesCS3B02G022500	All locations	RTM	6.66e-05	0.0467	2.03557		Glycine-rich domain-containing protein-like
5332-BobWhite_rep_c63085_120	3B	11243385	66581492	TraesCS3B02G099400	All locations	RTM	1.33e-05	0.014	2.63132		Peptidase M48	CAAX prenyl protease 1
					All locations	mrMLM	3.32e-08	0.000140984	11.9421		Target SNARE coiled-coil homology domain
75559-wsnp_BE499016B_Ta_2_1	3B	49806506	661016320	TraesCS3B02G423500	MDN	mrMLM	5.52e-05	0.0360171	2.3064		Target SNARE coiled-coil homology domain
28781-Excalibur_c76110_101	3B	60541780	760137269	TraesCS3B02G517100	All locations	FASTmrMLM	4.68e-06	0.00795035	3.7955		RNA-binding domain	RNA recognition motif domain
					All locations	mrMLM	9.3e-06	0.0112732	5.0927		RNA-binding domain	RNA recognition motif domain
4262-BobWhite_c6974_329	3D	41037831	460250774	TraesCS3D02G348500	All locations	mrMLM	6.45e-06	0.0109499	2.6867		Transmembrane protein GPR107/GPR108-like
35630-IACX1049	3D	51566664	551981733	TraesCS3D02G441600	MDN	mrMLM	9.97e-08	0.000423201	3.7532
48662-Kukri_rep_c101532_1046	3D	58593371	591985403	TraesCS3D02G504500	SK	RTM	4.93e-05	0.0623	4.6567	1	Papain-like cysteine peptidase superfamily	Ulp1 protease family, C-terminal catalytic domain
67877-Tdurum_contig13140_69	4A	6864193	59321657	TraesCS4A02G062800	SK	pLARmEB	1.61e-05	0.0136319	2.4916		Winged helix DNA-binding domain superfamily	Heat shock factor (HSF)-type, DNA-binding
					SK	pKWmEB	4.37e-07	0.00123747	7.7587		Winged helix DNA-binding domain superfamily	Heat shock factor (HSF)-type, DNA-binding
					SK	FASTmrMLM	1.86e-05	0.0394545	3.1143		Winged helix DNA-binding domain superfamily	Heat shock factor (HSF)-type, DNA-binding
47419-Kukri_c67793_237	4A	34449488	595821093	TraesCS4A02G294400	SK	mrMLM	5.9e-06	0.0100148	4.0301	1	Ankyrin repeat-containing domain	BTB/POZ domain
54888-RAC875_c19718_551	4A	36299321	603453604	TraesCS4A02G311200	All locations	mrMLM	1.34e-05	0.0126476	3.3204	1	Zinc finger, RING/FYVE/PHD-type
					MDN	mrMLM	2.75e-06	0.00466716	4.4456	1	Zinc finger, RING/FYVE/PHD-type
58552-RAC875_c49370_327	4A	41722672	629917691	TraesCS4A02G356400	All locations	mrMLM	1.43e-05	0.0121671	1.1184		Kelch-type beta propeller	Acyl-CoA binding protein
22324-Excalibur_c13811_1086	4A	53364616	723810464	TraesCS4A02G458600	SK	RTM	2.16e-06	0.0136	7.57965		Nucleotide-binding alpha-beta plait domain superfamily	RNA-binding domain superfamily
23633-Excalibur_c21395_291	4A	55187647	734000589	TraesCS4A02G474900	SK	FASTmrMLM	3.15e-07	0.00267582	4.9667	1	Leucine-rich repeat domain superfamily	NB-ARC, coiled-coil domain, P-loop NTPase
53152-RAC875_c10704_67	4B	14638311	154114340	TraesCS4B02G125200	MDN	ISIS EM-BLASSO	4.51e-09	3.83e-05	7.7827
62918-RAC875_rep_c72961_977	4B	38658268	616999234	TraesCS4B02G325900	OTT	mrMLM	4.59e-08	0.000389531	6.0579		Ubiquitin-like domain superfamily	UBA-like superfamily
58215-RAC875_c46098_110	4B	46695410	669559717	TraesCS4B02G395300	All locations	mrMLM	7.37e-06	0.0104241	3.2586
55110-RAC875_c2099_2066	4B	46800650	670439103	TraesCS4B02G395800	All locations	pKWmEB	5.53e-05	0.042674	5.0652	1	Zinc finger, RING/FYVE/PHD-type
24829-Excalibur_c29380_255	5A	3431397	26469747	TraesCS5A02G030500	OTT	pLARmEB	1.45e-06	0.00307678	6.3		Tubulin-specific chaperone A
					OTT	pKWmEB	4.08e-06	0.00866157	12.4011		Tubulin-specific chaperone A
					OTT	FASTmrEMMA	5.95e-07	0.00252364	8.3224		Tubulin-specific chaperone A
66289-Tdurum_contig10128_593	5A	6057812	48464957	TraesCS5A02G053400	OTT	RTM	6.16e-06	0.0194	9.71713	1	Papain-like cysteine peptidase superfamily	Ulp1 protease family, C-terminal catalytic domain
8437-BS00046773_51	5A	6149055	49956315	TraesCS5A02G054000	OTT	RTM	6.16e-06	0.0194	9.71713
46209-Kukri_c52_225	5A	41481632	559070986	TraesCS5A02G357000	OTT	FASTmrEMMA	2.21e-05	0.037453	5.3404		Tetratricopeptide-like helical domain	Tetratricopeptide repeat
					OTT	ISIS EM-BLASSO	2.26e-05	0.0479178	5.4103		Tetratricopeptide-like helical domain	Tetratricopeptide repeat
27236-Excalibur_c51589_200	5A	41813185	561660942	TraesCS5A02G359900	All locations	mrMLM	1.08e-12	9.21e-09	11.2932		PPM-type phosphatase
45725-Kukri_c47057_758	5B	32299434	447840598	TraesCS5B02G263200	SK	mrMLM	9.51e-07	0.00269182	4.2201
30867-Excalibur_rep_c67473_320	5B	38911880	506789600	TraesCS5B02G321800	MDN	pKWmEB	9.31e-07	0.00131706	5.0506	1	P-loop containing nucleoside triphosphate hydrolase	AAA+ ATPase domain, ClpA/ClpB, AAA lid domain
30952-Excalibur_rep_c68362_62	5B	64015960	695992792	TraesCS5B02G541500	SK	pLARmEB	6.35e-06	0.00674321	2.7437	1	Leucine-rich repeat domain superfamily	NB-ARC, coiled-coil domain, P-loop NTPase
					SK	ISIS EM-BLASSO	1.61e-06	0.00455864	4.3185	1	Leucine-rich repeat domain superfamily	NB-ARC, coiled-coil domain, P-loop NTPase
38458-Ku_c1454_984	5D	2722477	22378179	TraesCS5D02G025000	MDN	RTM	4.89e-07	0.00154	7.20123		Nucleolar complex protein 2
1281-BobWhite_c19443_131	5D	42312044	442701407	TraesCS5D02G365600	OTT	mrMLM	3.12e-07	0.00132623	6.952		PDZ superfamily	ClpP/crotonase-like domain
14533-CAP8_c145_89	5D	60487953	547273518	TraesCS5D02G532100	All locations	pLARmEB	1.36e-05	0.0192223	2.8096		Nucleic acid-binding, OB-fold	RNA-binding domain, S1
					All locations	RTM	1.77e-07	0.000559	8.11629		Nucleic acid-binding, OB-fold	RNA-binding domain, S1
					All locations	pKWmEB	1.86e-06	0.00262909	5.5284		Nucleic acid-binding, OB-fold	RNA-binding domain, S1
					All locations	FASTmrMLM	1.62e-05	0.0229037	3.3315		Nucleic acid-binding, OB-fold	RNA-binding domain, S1
					MDN	RTM	3.12e-06	0.00656	5.29485		Nucleic acid-binding, OB-fold	RNA-binding domain, S1
					MDN	pKWmEB	4.7e-10	2e-06	8.7217		Nucleic acid-binding, OB-fold	RNA-binding domain, S1
					MDN	FASTmrEMMA	1.55e-08	4.37e-05	5.8637		Nucleic acid-binding, OB-fold	RNA-binding domain, S1
					SK	ISIS EM-BLASSO	4.1e-07	0.00173991	6.325		Nucleic acid-binding, OB-fold	RNA-binding domain, S1
					SK	pLARmEB	1.5e-05	0.0141226	3.3425		Nucleic acid-binding, OB-fold	RNA-binding domain, S1
49205-Kukri_rep_c106820_591	5D	60847831	548880858	TraesCS5D02G534600	MDN	mrMLM	2.55e-05	0.0270247	8.59		Lysine-sensitive aspartokinase catalytic domain	Aspartate/glutamate/uridylate kinase
4362-BobWhite_c7604_254	5D	61181963	550206088	TraesCS5D02G537700	All locations	mrMLM	1.68e-07	0.000356439	5.2371		Protein of unknown function DUF2301
4361-BobWhite_c7604_181	5D	61182036	550206161	TraesCS5D02G537700	MDN	ISIS EM-BLASSO	6.44e-07	0.00109392	6.7262		Protein of unknown function DUF2301
					MDN	FASTmrMLM	5.42e-12	2.3e-08	14.1346		Protein of unknown function DUF2301
					MDN	pLARmEB	1.88e-11	7.97e-08	11.0479		Protein of unknown function DUF2301
11863-BS00094333_51	5D	63500457	559922461	TraesCS5D02G557600	All locations	pLARmEB	7.73e-12	6.56e-08	6.5246	1	Leucine-rich repeat domain superfamily	NB-ARC, coiled-coil domain, P-loop NTPase
					All locations	FASTmrMLM	1.22e-15	1.04e-11	9.5627	1	Leucine-rich repeat domain superfamily	NB-ARC, coiled-coil domain, P-loop NTPase
					All locations	FASTmrEMMA	5.43e-09	4.61e-05	8.3914	1	Leucine-rich repeat domain superfamily	NB-ARC, coiled-coil domain, P-loop NTPase
					All locations	ISIS EM-BLASSO	2.69e-14	2.28e-10	8.3824	1	Leucine-rich repeat domain superfamily	NB-ARC, coiled-coil domain, P-loop NTPase
					All locations	pKWmEB	3.5e-09	2.97e-05	7.6131	1	Leucine-rich repeat domain superfamily	NB-ARC, coiled-coil domain, P-loop NTPase
8077-BS00037002_51	6A	881698	2972683	TraesCS6A02G007500	MDN	FASTmrMLM	8.68e-06	0.014743	3.7396	1	F-box-like domain
					MDN	FASTmrEMMA	5.69e-07	0.0012078	5.8042	1	F-box-like domain
					MDN	pLARmEB	6.43e-07	0.00136552	4.2365	1	F-box-like domain
					MDN	pKWmEB	1.21e-06	0.00147217	3.7905	1	F-box-like domain
10105-BS00067630_51	6A	1330413	5221726	TraesCS6A02G011200	SK	pKWmEB	4.88e-06	0.0103633	7.7214
2064-BobWhite_c27145_318	6A	44504056	598635853	TraesCS6A02G377400	OTT	pKWmEB	8.91e-09	7.56e-05	6.4312		SAP-like protein BP-7	Rho termination factor
47927-Kukri_c8239_987	6B	5138821	25914950	TraesCS6B02G041900	MDN	mrMLM	1.47e-08	0.000124571	4.6119	1	Leucine-rich repeat domain superfamily	NB-ARC, coiled-coil domain, P-loop NTPase
72401-Tdurum_contig5486_177	6B	13057844	90280258	TraesCS6B02G109400	SK	RTM	3.31e-06	0.0105	9.28086		START-like domain superfamily
31558-Excalibur_s113695_111	6B	38090242	556491270	TraesCS6B02G310700	All locations	FASTmrEMMA	8.68e-06	0.0184288	3.9821		Threonine-tRNA ligase, class IIa	putative editing domain superfamily
					All locations	ISIS EM-BLASSO	1.54e-07	0.000435547	4.4536		Threonine-tRNA ligase, class IIa	putative editing domain superfamily
60190-RAC875_c68525_284	6B	46394530	657946526	TraesCS6B02G382800	SK	mrMLM	3.47e-07	0.00147297	13.2605	1	Zinc finger, RING-type	Zinc finger, RING/FYVE/PHD-type
8425-BS00046264_51	6B	52998819	704974282	TraesCS6B02G439600	OTT	FASTmrMLM	1.83e-05	0.0310303	3.0085	1	Ethylene receptor, Signal transduction histidine kinase	Dimerisation/phosphoacceptor domain
					OTT	pLARmEB	1.41e-05	0.0170513	2.3375	1	Ethylene receptor, Signal transduction histidine kinase	Dimerisation/phosphoacceptor domain
5593-BobWhite_rep_c66074_232	6B	53384033	706118869	TraesCS6B02G442600	All locations	pLARmEB	1.15e-05	0.0195969	2.0954	1	Leucine-rich repeat-containing N-terminal, plant-type	Leucine-rich repeat domain superfamily
					All locations	FASTmrEMMA	7.44e-07	0.00315883	5.1133	1	Leucine-rich repeat-containing N-terminal, plant-type	Leucine-rich repeat domain superfamily
					All locations	pKWmEB	5.5e-05	0.0466613	4.3661	1	Leucine-rich repeat-containing N-terminal, plant-type	Leucine-rich repeat domain superfamily
					All locations	ISIS EM-BLASSO	6.71e-06	0.00949085	3.5552	1	Leucine-rich repeat-containing N-terminal, plant-type	Leucine-rich repeat domain superfamily
46716-Kukri_c58096_480	6B	54893406	712390096	TraesCS6B02G456100	OTT	RTM	5.11e-09	3.22e-05	14.6707	1	Papain-like cysteine peptidase superfamily	Ulp1 protease family, C-terminal catalytic domain
13973-CAP7_c2923_366	6D	18202791	129784133	TraesCS6D02G154600	OTT	FASTmrEMMA	8.35e-07	0.0023623	11.5621	1	Plant lipoxygenase, PLAT/LH2 domain
					OTT	ISIS EM-BLASSO	1.03e-07	0.000873688	11.8349	1	Plant lipoxygenase, PLAT/LH2 domain
33585-GENE-3735_720	6D	45006739	462275413	TraesCS6D02G382700	MDN	MLM	5.48e-06	0.0465	11.2
12939-CAP11_c5372_271	6D	45904101	465742757	TraesCS6D02G390600	MDN	RTM	1.51e-07	0.000956	10.3505	1	Leucine-rich repeat domain superfamily	F-box-like domain superfamily
12245-BS00105522_51	6D	45922540	465959637	TraesCS6D02G390700	MDN	RTM	1.51e-07	0.000956	10.3505
50713-Kukri_s118416_65	7A	23823496	167271145	TraesCS7A02G205200	MDN	RTM	5.23e-06	0.00825	4.36904		Four-carbon acid sugar kinase, N-terminal domain	6-phosphogluconate dehydrogenase-like, C-terminal domain
50713-Kukri_s118416_65	7A	23823496	167271145	TraesCS7A02G205200	MDN	FASTmrEMMA	2.48e-09	1.05e-05	19.5971		Four-carbon acid sugar kinase, N-terminal domain	6-phosphogluconate dehydrogenase-like, C-terminal domain
26882-Excalibur_c4759_564	7A	29050417	232751332	TraesCS7A02G250700	OTT	ISIS EM-BLASSO	1.24e-05	0.0349974	4.3662
					OTT	FASTmrEMMA	2.42e-07	0.00205805	7.3434
					OTT	pLARmEB	1.11e-06	0.0031386	6.3609
8051-BS00036422_51	7A	31385701	275545643	TraesCS7A02G269600	All locations	RTM	1.23e-10	7.77e-07	13.0475		Ubiquitin-like domain superfamily
78361-wsnp_Ex_c5330_9422106	7A	31402375	275920469	TraesCS7A02G269800	All locations	RTM	1.23e-10	7.77e-07	13.0475		Ubiquitin-like domain superfamily
687-BobWhite_c1469_112	7A	41976735	515009750	TraesCS7A02G351800	All locations	pLARmEB	2.71e-07	0.000765835	5.1286
65210-RFL_Contig6074_1058	7A	58881807	691535765	TraesCS7A02G502600	MDN	mrMLM	2.89e-05	0.0245209	2.1725		NAD(P)-binding domain superfamily	GDP-L-fucose synthase/GDP-L-colitose synthase
25155-Excalibur_c3188_1352	7A	59180229	692879432	TraesCS7A02G504800	SK	pKWmEB	1.93e-09	1.64e-05	15.5494		PPM-type phosphatase domain superfamily
81116-wsnp_Ra_c35321_43882919	7A	59181369	692880572	TraesCS7A02G504800	SK	FASTmrMLM	4.17e-06	0.0176899	10.3694		PPM-type phosphatase domain superfamily
30143-Excalibur_rep_c105674_315	7A	62516095	712307419	TraesCS7A02G533900	All locations	ISIS EM-BLASSO	2.47e-05	0.0261798	1.9631		SWEET sugar transporter
71429-Tdurum_contig43523_1458	7B	5580849	47742258	TraesCS7B02G048100	OTT	FASTmrEMMA	1.34e-05	0.0285362	4.432	1	DNA-binding domain superfamily	AP2/ERF domain
					OTT	FASTmrMLM	8e-06	0.0169706	4.8245	1	DNA-binding domain superfamily	AP2/ERF domain
36277-IACX82	7B	30390404	457383441	TraesCS7B02G247000	All locations	RTM	2.34e-06	0.00296	5.30177		homolog of anti-oxidant 1
73863-Tdurum_contig93324_764	7B	30405626	457401612	TraesCS7B02G247100	All locations	RTM	2.34e-06	0.00296	5.30177		Protein RETICULATA-related
30869-Excalibur_rep_c67475_1759	7B	33416114	498523612	TraesCS7B02G271600	MDN	FASTmrMLM	5.23e-07	0.00147923	4.8388	1	P-loop containing nucleoside triphosphate hydrolase	Plant PDR ABC transporter associated
					MDN	mrMLM	2.98e-05	0.0229715	5.931	1	P-loop containing nucleoside triphosphate hydrolase	Plant PDR ABC transporter associated
					MDN	ISIS EM-BLASSO	7.39e-08	0.000208995	5.7355	1	P-loop containing nucleoside triphosphate hydrolase	Plant PDR ABC transporter associated
58340-RAC875_c4732_1672	7B	36390764	533774856	TraesCS7B02G297000	SK	RTM	7.31e-05	0.0769	2.96048	1	Protein kinase domain	Serine/threonine-protein kinase, active site
80349-wsnp_Ku_c29256_39161320	7B	37020602	539232386	TraesCS7B02G302400	All locations	pKWmEB	1.82e-06	0.00309162	5.2293		Methioninyl-tRNA synthetase core domain	Aminoacyl-tRNA synthetase, class Ia, anticodon-binding
72089-Tdurum_contig50574_304	7B	41519004	597463583	TraesCS7B02G342500	All locations	RTM	1.54e-06	0.00243	4.78564		RNA-binding domain superfamily	RNA recognition motif domain
7573-BS00025286_51	7B	44846714	636508176	TraesCS7B02G370700	All locations	pKWmEB	1.79e-05	0.0169283	2.2947	1	Lysozyme-like domain superfamily	Glycoside hydrolase, family 19
74097-tplb0021f14_1700	7B	46943544	653898244	TraesCS7B02G388000	All locations	mrMLM	4.84e-08	0.000136972	9.459	1	Protein kinase-like domain superfamily	Serine/threonine-protein kinase, active site
31227-Excalibur_rep_c74234_183	7B	47036067	655037014	TraesCS7B02G388800	All locations	ISIS EM-BLASSO	5.41e-08	0.000229735	5.1042	1	Protein kinase-like domain superfamily	Serine/threonine-protein kinase, active site
75603-wsnp_BE605194B_Ta_2_1	7B	47295113	657932119	TraesCS7B02G391300	All locations	pLARmEB	6.97e-06	0.014791	4.2358	1	Protein kinase-like domain superfamily	Serine/threonine-protein kinase, active site
79099-wsnp_Ex_rep_c104090_88891443	7B	50479133	687803644	TraesCS7B02G419100	SK	pKWmEB	8.57e-09	3.64e-05	12.5196
9595-BS00065623_51	7D	1064876	4005296	TraesCS7D02G008200	MDN	FASTmrEMMA	2.96e-10	2.51e-06	11.1734	1	Leucine-rich repeat domain superfamily	NB-ARC, coiled-coil domain, P-loop NTPase
					MDN	pKWmEB	1.25e-11	1.06e-07	18.3956	1	Leucine-rich repeat domain superfamily	NB-ARC, coiled-coil domain, P-loop NTPase
22812-Excalibur_c16580_388	7D	4312102	18438257	TraesCS7D02G036100	MDN	pKWmEB	1.09e-05	0.0115283	7.233		Ribonuclease H-like superfamily	PAZ domain
19377-D_GDS7LZN02FSYZC_227	7D	11047160	58491641	TraesCS7D02G096000	OTT	pLARmEB	4.26e-06	0.00723247	5.0703	1	Leucine-rich repeat domain superfamily	NB-ARC, coiled-coil domain, P-loop NTPase
33938-GENE-4375_382	7D	42581935	465165900	TraesCS7D02G362100	MDN	mrMLM	7.64e-06	0.0108153	5.7298		Zinc/iron permease
79862-wsnp_JD_c69_109951	Un	2839998	24402452	TraesCSU02G024000	MDN	ISIS EM-BLASSO	2.56e-07	0.000542371	6.4361	1	Leucine-rich repeat domain superfamily	NB-ARC, coiled-coil domain, P-loop NTPase
					MDN	FASTmrMLM	2.34e-13	1.99e-09	13.4635	1	Leucine-rich repeat domain superfamily	NB-ARC, coiled-coil domain, P-loop NTPase
					MDN	pLARmEB	5.28e-13	4.48e-09	10.9584	1	Leucine-rich repeat domain superfamily	NB-ARC, coiled-coil domain, P-loop NTPase
12610-BS00110940_51	Un	10693539	81996418	TraesCSU02G092400	OTT	pKWmEB	1.34e-08	5.7e-05	7.9272	1	Protein kinase-like domain superfamily	Serine/threonine-protein kinase, active site
LR SEVERITY - WINTER DIVERSITY PANEL
10050-BS00067436_51	1A	49651471	578204373	TraesCS1A02G422900	MDN	FASTmrMLM	3.15e-06	0.0131	12.7162	1	Glycoside hydrolase	X8 domain
12157-BS00100994_51	1B	2775088	9936518	TraesCS1B02G021700	MDN	RTM	4.38e-09	1.57e-05	13.61		Protein of unknown function DUF247
38236-Ku_c11394_862	1B	24041649	339908061	TraesCS1B02G189500	All locations	ISIS EM-BLASSO	2.13e-05	0.0444	17.3601
24999-Excalibur_c30667_102	1B	25416491	360517459	TraesCS1B02G201300	MDN	pLARmEB	2.15e-07	0.000598	6.2048
8318-BS00042340_51	1B	48306563	630700832	TraesCS1B02G399600	All locations	mrMLM	2.12e-07	0.00177	4.5665		Radical SAM, alpha/beta horseshoe	Heme chaperone HemW-like, Elp3/MiaB/NifB
21002-Ex_c6145_2193	1D	4064972	12534520	TraesCS1D02G032200	MDN	mrMLM	1.27e-05	0.053	7.7607	1	Leucine-rich repeat domain superfamily	NB-ARC, coiled-coil domain, P-loop NTPase
					MDN	RTM	4.7e-06	0.0056	6.50443	1	Leucine-rich repeat domain superfamily	NB-ARC, coiled-coil domain, P-loop NTPase
18025-D_GB5Y7FA01EE4DJ_242	1D	31905163	361914448	TraesCS1D02G266100	MDN	MLM	9.54e-07	0.00265	24.366		Proteinase inhibitor I12, Bowman-Birk
16342-D_contig28058_60	1D	32600647	366674212	TraesCS1D02G272700	MDN	ISIS EM-BLASSO	1.4e-07	0.000584	7.4463		Palmitoyltransferase, DHHC domain
					MDN	pLARmEB	2.96e-06	0.00494	5.9943		Palmitoyltransferase, DHHC domain
					MDN	MLM	2.03e-07	0.0017	18.46		Palmitoyltransferase, DHHC domain
					OTT	ISIS EM-BLASSO	3.83e-05	0.0533	4.8724		Palmitoyltransferase, DHHC domain
					OTT	pLARmEB	3.07e-05	0.0512	5.6931		Palmitoyltransferase, DHHC domain
27190-Excalibur_c50934_159	2A	16172355	85289098	TraesCS2A02G140100	OTT	mrMLM	1.97e-09	1.64e-05	14.08		BSD domain
76918-wsnp_Ex_c17852_26612172	2A	24740344	197559361	TraesCS2A02G212800	All locations	RTM	2.39e-08	0.000171	13.796		Peptidase C65, otubain
15473-D_contig08350_924	2B	34598677	394098064	TraesCS2B02G286100	MDN	FASTmrEMMA	1.27e-06	0.0106	15.7878		Uncharacterized GPI-anchored protein At1g61900-lke
74910-tplb0048g05_866	2B	51811064	622904989	TraesCS2B02G433600	All locations	RTM	2.63e-05	0.0376	8.13007
56694-RAC875_c32066_684	2B	51907984	624539187	TraesCS2B02G434600	All locations	RTM	2.63e-05	0.0376	8.13007		Nucleophile aminohydrolases, N-terminal	Peptidase T2, asparaginase 2
19356-D_GDS7LZN02F3V0T_214	2D	4447245	14117424	TraesCS2D02G038300	MDN	pKWmEB	1.27e-06	0.00212	10.4371
46794-Kukri_c59403_339	2D	14704214	75001895	TraesCS2D02G129200	MDN	MLM	5.68e-07	0.00237	19.716	1	WD40/YVTN repeat-like-containing domain superfamily
17812-D_GA8KES401EQTMF_68	2D	40830648	446313187	TraesCS2D02G348400	MDN	RTM	4.23e-05	0.0302	3.18878		MFS transporter superfamily	Proton-dependent oligopeptide transporter family
27281-Excalibur_c5199_423	2D	57761712	593270920	TraesCS2D02G497400	MDN	FASTmrMLM	3.3e-06	0.00918	4.8753		Molybdopterin biosynthesis protein MoeA-like	MoeA, C-terminal, domain IV superfamily
30442-Excalibur_rep_c109863_383	3A	1553355	9854380	TraesCS3A02G013800	All locations	mrMLM	2.53e-05	0.0528	5.8711		NAD(P)-binding domain superfamily	Fatty acyl-CoA reductase, C-terminal
38473-Ku_c14982_168	3A	32086129	497649774	TraesCS3A02G270400	MDN	RTM	9.92e-07	0.00177	2.55084		PRONE domain	Rop guanine nucleotide exchange factor
76298-wsnp_Ex_c11397_18400400	3A	32093558	497655032	TraesCS3A02G270500	MDN	RTM	9.92e-07	0.00177	2.55084	1	Leucine-rich repeat domain superfamily	Serine-threonine/tyrosine-protein kinase domain
75655-wsnp_BF429272A_Ta_2_1	3A	32174382	498774691	TraesCS3A02G271100	MDN	RTM	9.92e-07	0.00142	NA	1	Protein kinase-like domain superfamily	Serine/threonine-protein kinase, active site
27648-Excalibur_c56240_200	3A	47600610	651627266	TraesCS3A02G406700	All locations	RTM	8.31e-06	0.0198	7.30491
2309-BobWhite_c29826_602	3A	47600943	651627599	TraesCS3A02G406700	All locations	RTM	8.31e-06	0.0198	7.30491
73056-Tdurum_contig67196_285	3A	49231993	662940157	TraesCS3A02G421500	All locations	RTM	1.95e-05	0.0349	8.9466		Armadillo-type fold	Clathrin/coatomer adaptor, Adaptor protein complex AP-4
71662-Tdurum_contig4598_502	3A	49262542	663181023	TraesCS3A02G421700	All locations	RTM	1.95e-05	0.0349	8.9466		P-loop NTPase	Small GTP-binding protein domain
25955-Excalibur_c3862_837	3B	23551169	245969143	TraesCS3B02G209800	MDN	FASTmrMLM	5.51e-08	0.00046	8.5499	1	Peroxidase
79515-wsnp_Ex_rep_c69783_68742690	3B	28373166	379995020	TraesCS3B02G240900	MDN	pLARmEB	1.59e-07	0.000663	6.6674		Armadillo-type fold	SIT4 phosphatase-associated protein family
					MDN	RTM	4.36e-05	0.0283	2.04665		Armadillo-type fold	SIT4 phosphatase-associated protein family
52937-RAC875_c101793_136	3D	50833788	547625537	TraesCS3D02G435400	All locations	ISIS EM-BLASSO	1.69e-05	0.047	3.0856	1	WD40/YVTN repeat-like-containing domain superfamily	Glutaminyl-peptide cyclotransferase
74685-tplb0040j04_1007	4A	51060107	708613278	TraesCS4A02G439000	MDN	pKWmEB	5.42e-08	0.000452	11.5215		Tetrapeptide transporter, OPT1/isp4	Oligopeptide transporter, OPT superfamily
37657-JD_c581_466	4A	51837268	713519525	TraesCS4A02G445600	OTT	pKWmEB	9.07e-10	3.78e-06	12.2061		Cytochrome P450
					OTT	pLARmEB	4.46e-06	0.0093	9.445		Cytochrome P450
					OTT	FASTmrMLM	3.28e-09	2.74e-05	19.3263		Cytochrome P450
					OTT	RTM	1.14e-10	8.15e-07	33.7683		Cytochrome P450
1382-BobWhite_c20322_559	4A	51840855	713523112	TraesCS4A02G445600	OTT	RTM	1.14e-10	8.15e-07	33.7683		Cytochrome P450
61163-RAC875_c96615_107	5A	24174452	403876844	TraesCS5A02G199000	MDN	RTM	2.43e-05	0.0193	1.5549
74800-tplb0044j06_689	5A	46857370	596013562	TraesCS5A02G403700	OTT	mrMLM	1.71e-05	0.0357	13.0474		Cold-regulated 413 protein
7154-BS00022555_51	5B	31089069	435769407	TraesCS5B02G252700	OTT	pKWmEB	1.87e-06	0.0039	13.9923	1	F-box-like domain superfamily	Galactose oxidase/kelch, beta-propeller
78640-wsnp_Ex_c6548_11355524	5B	31613461	439725143	TraesCS5B02G257300	MDN	mrMLM	1.63e-12	1.36e-08	40.1301	1	WRKY domain
					MDN	ISIS EM-BLASSO	3.49e-10	2.91e-06	21.7389	1	WRKY domain
					MDN	pKWmEB	4.18e-07	0.00116	22.7733	1	WRKY domain
6745-BS00021735_51	5B	49842188	593943053	TraesCS5B02G418200	OTT	pLARmEB	1.46e-12	1.22e-08	24.2947		Translation elongation factor EF1A
					OTT	ISIS EM-BLASSO	4.56e-11	3.8e-07	15.4065		Translation elongation factor EF1A
69972-Tdurum_contig30194_256	5B	56852582	653230498	TraesCS5B02G480700	OTT	mrMLM	1.91e-07	0.000797	12.8133		Ribosomal protein L24e-related
53681-RAC875_c13208_684	5B	60914209	680352542	TraesCS5B02G515900	OTT	pKWmEB	4.43e-12	3.7e-08	18.0763		Kelch-type beta propeller
77355-wsnp_Ex_c24031_33277856	5B	66218292	707133745	TraesCS5B02G560400	All locations	pLARmEB	8.71e-10	7.27e-06	7.6857		PGR5-like protein 1
19215-D_GDRF1KQ02GC5EV_278	5D	23857890	301127151	TraesCS5D02G198300	All locations	pLARmEB	1.53e-06	0.00425	8.1867		Peptidyl-arginine deiminase, Porphyromonas-type	Agmatine deiminase
					MDN	MLM	1.81e-06	0.00378	18.991		Peptidyl-arginine deiminase, Porphyromonas-type	Agmatine deiminase
					MDN	RTM	5.97e-06	0.0061	6.10962		Peptidyl-arginine deiminase, Porphyromonas-type	Agmatine deiminase
15609-D_contig11260_295	5D	56316822	526292356	TraesCS5D02G493600	All locations	RTM	4.08e-06	0.0146	9.03557		Tetratricopeptide-like helical domain superfamily	Pentatricopeptide repeat
					MDN	RTM	7.84e-11	5.6e-07	21.5964		Tetratricopeptide-like helical domain superfamily	Pentatricopeptide repeat
78974-wsnp_Ex_c965_1845676	6A	41299205	581747079	TraesCS6A02G349200	All locations	ISIS EM-BLASSO	1.69e-09	1.41e-05	8.9312		Cyclic nucleotide-binding domain
					All locations	pLARmEB	2.34e-08	9.76e-05	4.6091		Cyclic nucleotide-binding domain
					All locations	FASTmrMLM	6.19e-07	0.00516	7.9023		Cyclic nucleotide-binding domain
					All locations	pKWmEB	1.39e-06	0.0116	13.3198		Cyclic nucleotide-binding domain
60427-RAC875_c76675_372	6A	47241601	610199793	TraesCS6A02G401900	MDN	pLARmEB	2.14e-08	0.000179	4.1337
					MDN	FASTmrMLM	1.28e-05	0.0267	2.9158
					MDN	pKWmEB	3.1e-07	0.00129	3.5825
17318-D_F1BEJMU01DYWUS_134	6D	10958867	58096323	TraesCS6D02G093100	OTT	pLARmEB	1.82e-06	0.00759	3.559	1	F-box-like domain superfamily
					OTT	FASTmrMLM	2.76e-06	0.0115	3.4391	1	F-box-like domain superfamily
15945-D_contig18907_85	6D	45466639	463870710	TraesCS6D02G386600	OTT	ISIS EM-BLASSO	2.27e-07	0.000631	11.8743		Ribonuclease H-like superfamily	Exonuclease, RNase T/DNA polymerase III
					OTT	FASTmrMLM	6.83e-06	0.019	8.5249		Ribonuclease H-like superfamily	Exonuclease, RNase T/DNA polymerase III
24038-Excalibur_c23756_1461	7A	1831012	6485654	TraesCS7A02G014500	OTT	pLARmEB	2e-06	0.00556	7.9692
					OTT	ISIS EM-BLASSO	3.56e-06	0.00743	8.8813
25650-Excalibur_c35919_107	7A	30576856	259562231	TraesCS7A02G262700	All locations	mrMLM	9.97e-06	0.0277	12.1091
34228-GENE-4898_208	7A	46921148	572869014	TraesCS7A02G394500	OTT	ISIS EM-BLASSO	1.13e-07	0.000471	11.0944		Peptidase M16, N-terminal
48036-Kukri_c855_2107	7A	61634782	708138675	TraesCS7A02G525900	MDN	ISIS EM-BLASSO	1.32e-05	0.0275	7.2729	1	Zinc finger, CCCH-type
52617-Ra_c73849_639	7B	371126	1255228	TraesCS7B02G003000	OTT	pKWmEB	4.43e-09	1.23e-05	17.7345
39827-Ku_c68626_1054	7B	16796983	181035062	TraesCS7B02G142200	MDN	RTM	2.44e-07	0.000581	5.76121		SBP domain superfamily
4395-BobWhite_c7907_657	7B	16798817	181036896	TraesCS7B02G142200	MDN	RTM	2.44e-07	0.000581	5.76121		SBP domain superfamily
5616-BobWhite_rep_c66630_331	7B	43918268	624351237	TraesCS7B02G362600	MDN	RTM	6.23e-06	0.00557	3.26525		P-loop NTPase, Transcription factor, GTP-binding domain	Translation protein, beta-barrel domain superfamily
34569-IAAV2530	7D	17619224	102541074	TraesCS7D02G154500	OTT	mrMLM	5.44e-06	0.0151	8.369
15734-D_contig14443_745	7D	29487395	232496636	TraesCS7D02G257100	MDN	pKWmEB	1.08e-06	0.00225	9.8214		Ribosomal protein L32e superfamily
					MDN	ISIS EM-BLASSO	5.07e-06	0.0141	3.2952		Ribosomal protein L32e superfamily
					MDN	pLARmEB	1.84e-06	0.00384	3.4934		Ribosomal protein L32e superfamily
8614-BS00052386_51	7D	32681419	289257907	TraesCS7D02G282700	All locations	mrMLM	3.73e-07	0.00156	18.8344		Conserved oligomeric Golgi complex, subunit 3
16386-D_contig28902_391	7D	41569449	456495802	TraesCS7D02G353200	All locations	ISIS EM-BLASSO	1.02e-05	0.0425	5.0364	1	F-box-like domain
23018-Excalibur_c17808_478	7D	58721898	609277272	TraesCS7D02G503700	OTT	ISIS EM-BLASSO	3.3e-05	0.0551	3.8853	1	Protein kinase, ATP binding site	Serine/threonine-protein kinase, active site
† Position on the concatenated exome sequence (ES) of Chinese Spring (includes high-confidence genes and up to 5Kb flanking sequences)
‡ Position on the Chinese Srping (CS) reference genome sequence v.1.0 (IWGSC 2018)
§ MDN, Morden; OTT, Ottawa; SK, Saskatoon
